# Supplementary material for: A review of gamified approaches to encouraging eco-driving
Source: Front Psychol. 2022 Sep 2;13:970851. doi: 10.3389/fpsyg.2022.970851 (PMC9479761; doi:10.3389/fpsyg.2022.970851)
Supplement: Supplementary Table 1 — Excel Spreadsheet containing citations for all sources located in the searches, detailing the fate of each source (whether included or excluded), and where excluded, the stage at which exclusion occurred. [file Table_1.XLSX]

## Sheet: Web of Science 73
Authors	Year	Title	Source	Document Type	Abstract
Angelis, S; Johnsson, A; Klomp, M; Hansson, R; Katzourakis, D	2016	Virtual brake software release	DYNAMICS OF VEHICLES ON ROADS AND TRACKS	Proceedings Paper	The ever-increasing competitive automotive market has stimulated manufacturers to develop vehicles that have to excel in terms of safety, design, sustainability and driving pleasure. It is therefore imperative for manufacturers to adopt sophisticated development processes and a well laid-out product lifecycle management plan to ensure their seamless presence in the market. Full exploitation of si…
Asadi, M; Fathy, M; Mahini, H; Rahmani, AM	2022	An Evolutionary Game Approach to Safety-Aware Speed Recommendation in Fog/Cloud-Based Intelligent Transportation Systems	IEEE TRANSACTIONS ON INTELLIGENT TRANSPORTATION SYSTEMS	Article; Early Access	Vehicle speed is known as one of the most important parameters in the various goals for driving. Although the most critical goal of driving is safety, each driver can consider another secondary goal, such as reducing travel time, economical driving, green driving, passenger comfort, etc. In this paper, we propose a smartphone-based application that utilizes the cloud/fog computing service infrast…
Ayaz, F; Sheng, ZG; Tian, DX; Guan, YL; Leung, V	2020	A Voting Blockchain based Message Dissemination in Vehicular Ad-Hoc Networks (VANETs)	ICC 2020 - 2020 IEEE INTERNATIONAL CONFERENCE ON COMMUNICATIONS (ICC)	Proceedings Paper	Secure message dissemination is an important requirement of intelligent transportation systems (ITS). Existing solutions, such as broadcasting, are effective in flooding a message to a wider area, however, they are inherently unreliable and bandwidth inefficient. Furthermore, it is difficult to both assess the authenticity of a message and maintain the privacy of sender in a single solution. More…
Azmee, AA; Alvee, BI; Tisha, SN; Choudhury, PP; Antara, RSI; Kafi, AH	2020	Bus Management & Road Accident Prevention System for Smart Cities	2020 23RD INTERNATIONAL CONFERENCE ON COMPUTER AND INFORMATION TECHNOLOGY (ICCIT 2020)	Proceedings Paper	Reckless driving is a major traffic violation, caused by exceeding the speed limit, changing lanes irregularly, the drowsiness of drivers, or influence of drugs or alcohol on them. This dangerous driving practice often results in road accidents and injury or death of many innocent people. Therefore, we have come up with a new idea for this sector. Our system intends to implement a disciplined onl…
Bahadoor, K; Hosein, P	2016	Application for the Detection of Dangerous Driving and an Associated Gamification Framework	2016 IEEE 4TH INTERNATIONAL CONFERENCE ON FUTURE INTERNET OF THINGS AND CLOUD WORKSHOPS (FICLOUDW)	Proceedings Paper	In today's highly technology-based world, wireless devices such as smartphones, are being utilized for solving daily problems and in making our daily lives more efficient. Although smartphones are sometimes to be blamed for vehicular accidents, they can also be used for helping to avoid accidents. In this paper we consider one such possible solution (called Project Drive), in which a smartphone b…
Beloufa, S; Cauchard, F; Vedrenne, J; Vailleau, B; Kemeny, A; Merienne, F; Boucheix, JM	2019	Learning eco-driving behaviour in a driving simulator: Contribution of instructional videos and interactive guidance system	TRANSPORTATION RESEARCH PART F-TRAFFIC PSYCHOLOGY AND BEHAVIOUR	Article	The present paper deals with how to design and test an eco-driving training tool in the form of a digital educational game, including a specific guidance system interface to teach eco-driving rules. We tested whether learners could reproduce the eco-driving behaviour and implement the rules once they were autonomous. We also aimed to validate the method as a relevant eco-driving teaching tool tha…
Borawski, M; Borawska, A	2021	The use of a computer game in a social campaign to improve road safety	KNOWLEDGE-BASED AND INTELLIGENT INFORMATION & ENGINEERING SYSTEMS (KSE 2021)	Proceedings Paper	Road traffic deaths and injuries remain a major global concern and current trends suggest that it would not change in the near future. To reverse this tendency, numerous actions are being taken to improve road safety. The implementation and enforcement of legislation on key risk factors are main elements of an integrated strategy to prevent road fatalities in most countries. Legislation should, h…
Brouwer, RFT; Stuiver, A; Hof, T; Kroon, L; Pauwelussen, J; Holleman, B	2015	Personalised feedback and eco-driving: An explorative study	TRANSPORTATION RESEARCH PART C-EMERGING TECHNOLOGIES	Article	Conventional road transport has negative impact on the environment. Stimulating eco-driving through feedback to the driver about his/her energy conservation performance has the potential to reduce CO2 emissions and promote fuel cost savings. Not all drivers respond well to the same type of feedback. Research has shown that different drivers are attracted to different types of information and feed…
Bylykbashi, K; Qafzezi, E; Ikeda, M; Matsuo, K; Barolli, L	2020	Fuzzy-based Driver Monitoring System (FDMS): Implementation of two intelligent FDMSs and a testbed for safe driving in VANETs	FUTURE GENERATION COMPUTER SYSTEMS-THE INTERNATIONAL JOURNAL OF ESCIENCE	Article	Vehicular Ad hoc Networks (VANETs) have gained a great attention due to the rapid development of mobile Internet and Internet of Things (IoT) applications. On the other hand, the competition in the automotive industry has turned into an unprecedented race to who will be the first to provide the fully autonomous cars. However, the fully autonomous driving is still a bit far from deployment, and fo…
Chen, JN; Zhang, C; Luo, JT; Xie, JF; Wan, Y	2020	Driving Maneuvers Prediction Based Autonomous Driving Control by Deep Monte Carlo Tree Search	IEEE TRANSACTIONS ON VEHICULAR TECHNOLOGY	Article	Autonomous driving has attracted significant attention in recent years. With the booming of artificial intelligence (AI), deep learning technologies have been applied to autonomous driving to help vehicles better perceive the environment. Besides the perceiving environment, predictive driving is another prominent smooth control and safe driving skill for human drivers. In this work, we develop a …
Cheng, S; Li, L; Chen, X; Fang, SN; Wang, XY; Wu, XH; Li, WB	2020	Longitudinal autonomous driving based on game theory for intelligent hybrid electric vehicles with connectivity	APPLIED ENERGY	Article	Autonomous driving hybrid electric vehicles can offer unprecedented opportunities for autonomous safe & energy-efficient driving. However, how to integrate energy optimization during the car-following process and vehicle safety under complex traffic flow is a formidable challenge. Moreover, the coordinated control of three chassis parts including electric motor, internal combustion engine and veh…
Dange, GR; Paranthaman, PK; Bellotti, F; Samaritani, M; Berta, R; De Gloria, A	2017	Assessment of Driver Behavior Based on Machine Learning Approaches in a Social Gaming Scenario	APPLICATIONS IN ELECTRONICS PERVADING INDUSTRY, ENVIRONMENT AND SOCIETY	Proceedings Paper	The estimation of user performance analytics in the area of car driver performance was carried out in this paper. The main focus relies on the descriptive analysis with our approaches emphasizing on educational serious games, in order to improvise the driver's behavior (specifically green driving) in a pleasant and challenging way. We also propose a general Internet of the Things (IoT) social gam…
Degirmenci, K	2018	Toward a Gamified Mobile Application to Improve Eco-Driving: A Design and Evaluation Approach Emergent Research Forum (ERF)	AMCIS 2018 PROCEEDINGS	Proceedings Paper	The design and adoption of gamified information systems have been increasingly discussed in various fields of application such as education, health, crowdsourcing, or sustainability. We focus on the field of environmental sustainability and follow a design science research approach to develop and evaluate an instantiation of an artifact in the form of a gamified mobile application that supports e…
Deng, C; Liu, G; Jia, AQ; Wen, X; Ma, K; Ying, BS	2021	Study on LiDAR Obstacle Detection for FSAC Racing Car Chiji	2021 4TH INTERNATIONAL CONFERENCE ON INTELLIGENT AUTONOMOUS SYSTEMS (ICOIAS 2021)	Proceedings Paper	Environmental perception is the premise of autonomous driving. Aiming at the environmental perception technology of racing car, this paper studies the LiDAR obstacle detection algorithm, aiming at providing necessary information for the path planning and vehicle control of racing car, and realizing the safe driving of the car. An algorithm of target pile bucket detection of driverless formula rac…
Donatantonio, F; D'Amato, A; Arsie, I; Pianese, C	2018	A multi-layer control hierarchy for heavy duty vehicles with off-line dual stage dynamic programming optimization	TRANSPORTATION RESEARCH PART C-EMERGING TECHNOLOGIES	Article	In this paper, a multi-level, comprehensive control technique for a heavy duty vehicle, capable of reducing fuel consumption while complying with engine constraints on both operating conditions and smoke emissions has been developed. The higher control layer, using road data, engine and vehicle parameters, computes the optimal speed and gear shifting profiles through an off-line, dual step dynami…
Franke, T; Arend, MG; McIlroy, RC; Stanton, NA	2017	What Drives Ecodriving? Hybrid Electric Vehicle Drivers' Goals and Motivations to Perform Energy Efficient Driving Behaviors	ADVANCES IN HUMAN ASPECTS OF TRANSPORTATION	Proceedings Paper	Hybrid electric vehicles (HEVs) can significantly contribute to sustainable road transport, yet driver behavior has a marked effect on actual energy efficiency (i.e., the ultimate sustainability effect). The objective of the present research was to examine ecodriving motivation of HEV drivers. To this end, we recruited 39 HEV drivers with above-average fuel efficiencies (suggesting at least some …
Gardelis, K; Lalos, AS; Moustakas, K	2018	Development of an Eco-Driving Simulation Training System with Natural and Haptic Interaction in Virtual Reality Environments	VISIGRAPP 2018: PROCEEDINGS OF THE 13TH INTERNATIONAL JOINT CONFERENCE ON COMPUTER VISION, IMAGING AND COMPUTER GRAPHICS THEORY AND APPLICATIONS - VOL 2: HUCAPP	Proceedings Paper	Road transport is one of the major causes of the environmental pollution. Among the actions individuals can take to reduce their green-house gases associated with personal transportation, there is to operate their current vehicles more efficiently. Behavioral theory strongly confirms that the most important educational element in changing driver behavior is the direct feedback while driving on an…
Gunther, M; Kacperski, C; Krems, JF	2020	Can electric vehicle drivers be persuaded to eco-drive? A field study of feedback, gamification and financial rewards in Germany	ENERGY RESEARCH & SOCIAL SCIENCE	Article	Promoting eco-driving with battery electric vehicles (BEVs) can help drivers reduce their average energy consumption and enhance the driving range of a BEV. The present study examined the influence of three persuasive strategies (feedback regarding energy consumption, gamification, and financial rewards) compared to a baseline condition (no feedback or intervention) on the average BEV energy cons…
Guo, JX	2019	Design of the Downhill Automatic Liquid Damping Reduction Mechanism on the carbon-free car	2018 4TH INTERNATIONAL CONFERENCE ON ENVIRONMENTAL SCIENCE AND MATERIAL APPLICATION	Proceedings Paper	The carbon-free car is driven by gravity potential energy, through the mechanism to complete the specific direction control and avoid obstacles, to achieve the driving purpose of the car. The event is a national science and technology innovation activity project organized by relevant departments. It is a competition that demonstrates the engineering training and comprehensive ability of college s…
Heyes, D; Daun, TJ; Zimmermann, A; Lienkamp, M	2015	The Virtual Driving Coach - design and preliminary testing of a predictive eco-driving assistance system for heavy-duty vehicles	EUROPEAN TRANSPORT RESEARCH REVIEW	Article	Purpose The commercial vehicle sector is characterized by high competitive pressure. Fuel consumption is one major factor that influences the transport efficiency and competitiveness of logistics companies. Therefore, an eco-driving assistance system (EDAS) is developed in order to support the driver in sustainably maintaining an efficient driving style- the Virtual Driving Coach (ViDCo). In this…
Hinnant, JB; Stavrinos, D	2020	Rewards decrease risky decisions for adolescent drivers: Implications for crash prevention	TRANSPORTATION RESEARCH PART F-TRAFFIC PSYCHOLOGY AND BEHAVIOUR	Article	Motor vehicle crashes (MVCs) are a major contributor to adolescent mortality. Adolescent drivers are more likely to make risky decisions in the presence of peers. However, rewards have also been shown to improve decision making in adolescence. Our goal was to determine if peer observation and reward effects on decision-making were dependent upon adolescent driving styles. Twenty-four healthy adol…
Hitomi, K; Matsui, K; Rivas, A; Corchado, JM	2020	Development of a Dangerous Driving Suppression System Using Inverse Reinforcement Learning and Blockchain	DISTRIBUTED COMPUTING AND ARTIFICIAL INTELLIGENCE, 16TH INTERNATIONAL CONFERENCE	Proceedings Paper	Casualty injury rate in car accident is still high level. The number of annual traffic accident casualties in the world today is as much as 1.35 million, and those accidents are caused by reckless driving such as signal ignoring and over speed. In this research, we propose a system which can encourage drivers to make safe driving voluntary using a driving manner evaluation mechanism. Our proposed…
Hollerit, B; Prendinger, H; Jain, R; Fontes, D; Campos, H; Damas, H; Fang, AJ; Prada, R; Cavazza, M	2021	Implementation and Analytics of the Distributed Eco-Driving Simulation iCO(2)	IEEE ACCESS	Article	We describe iCO(2), a simulation platform for collecting driving behavior data. It is designed as the first massively multiplayer online game for mobile devices to practice eco-friendly driving. It facilitates the collection of large-scale data on driving behavior to better understand compliance and incentive mechanisms for eco-driving and users' preferences. We present the results of a campaign …
Hsu, CC; Chen, YL; Chou, WC; Huang, SH; Chang, KK	2018	Motorcycle Riding Safety Education With Virtual Reality	2018 IEEE INTERNATIONAL CONFERENCE ON ARTIFICIAL INTELLIGENCE AND VIRTUAL REALITY (AIVR)	Proceedings Paper	Young novice drivers are the group of drivers most likely to crash. Young novice drivers who tend to misidentify potential hazards in the traffic environment. There are a number of factors that contribute to the high crash risk experienced by these drivers. Age and lack of driving experience are the main factors behind young drivers having an increased risk of being involved in a road traffic col…
Huang, TH; Nikulin, V; Chen, LB	2016	Detection of Abnormalities in Driving Style Based on Moving Object Trajectories without Labels	PROCEEDINGS 2016 5TH IIAI INTERNATIONAL CONGRESS ON ADVANCED APPLIED INFORMATICS IIAI-AAI 2016	Proceedings Paper	Being able automatically recognize the driving style is a very important and challenging task with many practical applications, including insurance. Note that hand labelling of the driving trajectories represents a very time-consuming task. To overcome this problem, we can reduce thousands of variable-length trajectories to the traditional rectangular format, using quantile-based technique. After…
Klemke, R; Kravcik, M; Bohuschke, F	2014	Energy-Efficient and Safe Driving Using a Situation-Aware Gamification Approach in Logistics	GAMES AND LEARNING ALLIANCE	Proceedings Paper	Safety and energy-efficiency is the main aim of every reasonable driver. But often there is too much relevant information a driver has to take into account and evaluate. A useful support can be provided by technology that can observe the driver's situation, analyze it, and offer individualized information and services to the driver. Moreover, by means of gamification mechanisms drivers can receiv…
Kountouriotis, GK; Wilkie, RM; Gardner, PH; Merat, N	2015	Looking and thinking when driving: The impact of gaze and cognitive load on steering	TRANSPORTATION RESEARCH PART F-TRAFFIC PSYCHOLOGY AND BEHAVIOUR	Article	Driving around bends at high speeds is a task performed by many on a daily basis but the underlying mechanisms of steering control remain largely unknown. Previous research has shown that when steering, gaze direction can be a critical component of success. However, with increased use of in-vehicle information systems (IVIS), there is growing competition over the same resources that are needed to…
Lalos, AS; Nousias, S; Moustakas, K	2018	GamECAR: Gamifying Self-Management of Eco-driving	ERCIM NEWS	Article	GamECAR is a Euroean project that aims to teach drivers to adopt an eco-friendly driving style through a serious games platform.
Li, Q; Tay, R	2014	Improving drivers' knowledge of road rules using digital games	ACCIDENT ANALYSIS AND PREVENTION	Article	Although a proficient knowledge of the road rules is important to safe driving, many drivers do not retain the knowledge acquired after they have obtained their licenses. Hence, more innovative and appealing methods are needed to improve drivers' knowledge of the road rules. This study examines the effect of game based learning on drivers' knowledge acquisition and retention. We find that playing…
Ludwig, TD	2000	Intervening to improve the safety of delivery drivers: A systematic behavioral approach	JOURNAL OF ORGANIZATIONAL BEHAVIOR MANAGEMENT	Review	This monograph reviews seven field studies that evaluated behavior-based interventions designed to increase safe-driving practices of pizza deliverers. Intervention strategies focused primarily on variations of goal-setting and feedback techniques, including: (a) nonnumerical goals in an awareness and promise card intervention; (b) nonnumerical goals mandated as company policy; (c) participative …
Ludwig, TD; Biggs, J; Wagner, S; Geller, ES	2001	Using public feedback and competitive rewards to increase the safe driving of pizza deliverers	JOURNAL OF ORGANIZATIONAL BEHAVIOR MANAGEMENT	Article	This study investigated the effects of a safe driving competition facilitated by publicly-posted individual feedback. The turn-signal use, safety-belt use, and complete intersection stopping of 82 pizza deliverers were observed at two experimental and three control stores, as well as among the civilian population. After baseline observations, pizza deliverers received posted weekly individual fee…
Magana, VC; Munoz-Organero, M	2015	GAFU: Using a Gamification Tool to Save Fuel	IEEE INTELLIGENT TRANSPORTATION SYSTEMS MAGAZINE	Article	In this paper, we propose, implement and user-validate a training tool for saving fuel that uses some elements from games in order to promote efficient driving and provide feedback to the user. The proposed system uses a fuzzy logic system in order to assess the driving style from the point of view of the fuel consumption. The output is a score between 0 (not efficient) and 10 (efficient). This v…
Magana, VC; Organero, MM	2013	GAFU: A game to save fuel using social networks	2013 INTERNATIONAL CONFERENCE ON CONNECTED VEHICLES AND EXPO (ICCVE)	Proceedings Paper	In this paper, we propose a social game to promote efficient driving and provide feedback to the user. The proposed system uses a fuzzy logic system in order to assess the driving style from the point of view of the fuel consumption. The output is a score between 0 (not efficient) and 10 (efficient). This value can be compared with the score from other users of the social network that have simila…
Makan, H; Heyns, GJ	2018	Sustainable supply chain initiatives in reducing greenhouse gas emission within the road freight industry	JOURNAL OF TRANSPORT AND SUPPLY CHAIN MANAGEMENT	Article	Background: Global supply chains have evolved from a traditional simple supply chain to one that is filled with complexities and uncertainties. The increase in road freight transportation has resulted in an escalation in the emission of greenhouse gases (GHG) into the atmosphere, impacting climate change. Objectives: The purpose of this article was to investigate the implementation of sustainable…
Malkawi, MI; AlBashiti, AI; Khasawneh, MA; Al-Migdadi, S; Alsharman, H	2015	Architectural Framework for Decision Support for Connectivity and Mobility on Roads and Vehicles Using Fuzzy Logic and Neural Networks	INNOVATION MANAGEMENT AND SUSTAINABLE ECONOMIC COMPETITIVE ADVANTAGE: FROM REGIONAL DEVELOPMENT TO GLOBAL GROWTH, VOLS I - VI, 2015	Proceedings Paper	This paper presents an architectural framework presenting a model for a safe driving environment, more efficient transport operations, lower environmental impacts and increased road safety for the driver, the vehicle in motion, and other objects near the vehicle such as pedestrians, vehicles, and property. The model utilizes a highly sophisticated neuro-fuzzy system to detect human status, which …
Marti, FS; Miquel, EM	2016	Driver feedback mobile app	XII CONGRESO DE INGENIERIA DEL TRANSPORTE	Proceedings Paper	This paper faces the human factor in driving and its consequences for road safety. It presents the concepts behind the development of a smartphone app capable of evaluating drivers' performance. The app provides feedback to the driver in terms of a grade (between 0 and 10) depending on the aggressiveness and risks taken while driving. These are computed from the cumulative probability distributio…	Duplicate - same as Soriguera below
Maruyama, H; Saito, Y; Yamada, M	2016	An analysis of changes in attention based on miniature eye movements	2016 11TH INTERNATIONAL CONFERENCE ON COMPUTER SCIENCE & EDUCATION (ICCSE)	Proceedings Paper	Understanding the mental state of the driver is important in supporting safe driving. We examined miniature eye movements, focusing in particular on microsaccades, which increase when the driver turns his or her attention to a visual target. Standard deviations in miniature eye movements increased after passing a traffic sign when measured using a simple game-style eye movement detecting system.
Massoud, R; Bellotti, F; Poslad, S; Berta, R; De Gloria, A	2019	Towards a Reality-Enhanced Serious Game to Promote Eco-Driving in the Wild	GAMES AND LEARNING ALLIANCE, GALA 2019	Proceedings Paper	Reality-enhanced serious games (RESGs) incorporate data from the real world to enact training in the wild. This - with the proper cautions due to safety - can be done also for daily activities, such as driving. We have developed two modules that may be integrated as field user performance evaluators in third-party RESGs, aimed at improving driver's fuel efficiency. They exploit vehicular signals …
Massoud, R; Berta, R; Poslad, S; De Gloria, A; Bellotti, F	2021	IoT Sensing for Reality-Enhanced Serious Games, a Fuel-Efficient Drive Use Case	SENSORS	Article	Internet of Things technologies are spurring new types of instructional games, namely reality-enhanced serious games (RESGs), that support training directly in the field. This paper investigates a key feature of RESGs, i.e., user performance evaluation using real data, and studies an application of RESGs for promoting fuel-efficient driving, using fuel consumption as an indicator of driver perfor…
Massoud, R; Poslad, S; Bellotti, F; Berta, R; Mehran, K; De Gloria, A	2018	A Fuzzy Logic Module to Estimate a Driver's Fuel Consumption for Reality-Enhanced Serious Games	INTERNATIONAL JOURNAL OF SERIOUS GAMES	Article	Reality-enhanced gaming is an emerging serious game genre, that could contextualize a game within its real instruction-target environment. A key module for such games is the evaluator, that senses a user performance and provides consequent input to the game. In this project, we have explored an application in the automotive field, estimating driver performance in terms of fuel consumption, based …
Mauri, GL; Bressan, E; Velardo, FC; Cacciabue, PC	2018	Dynamic risk assessment during eco-driving behaviors for conventionally fueled vehicles	SAFETY AND RELIABILITY - SAFE SOCIETIES IN A CHANGING WORLD	Proceedings Paper	The urgency of applying a more ethical approaches to get to a sustainable low-carbon economy by 2050 requires to implement a model of sustainable mobility, which embraces social, economical and industrial activities. In this horizon, behavioral change can produce considerable benefits whose effects are distributed on wider period. In this direction, the GamECAR project aims at provoking a change …
McConky, K; Chen, RB; Gavi, GR	2018	A comparison of motivational and informational contexts for improving eco-driving performance	TRANSPORTATION RESEARCH PART F-TRAFFIC PSYCHOLOGY AND BEHAVIOUR	Article	Eco-driving, the practice of operating a vehicle with environmentally friendly objectives, has been the focus of an increasing number of driving studies over the past decade, as new forms of vehicle automation and more driver-centric feedback continually emerge. Common benefits range from reducing carbon footprints and emissions to better fuel economy. Studies have also examined the effectiveness…
Min, K; Kim, H; Huh, K	2018	Deep Q Learning Based High Level Driving Policy Determination	2018 IEEE INTELLIGENT VEHICLES SYMPOSIUM (IV)	Proceedings Paper	With the commercialization of various Driver Assistance Systems (DAS), those vehicles have some autonomous functions like Smart Cruise Control (SCC) and Lane Keeping System (LKS). It is believed that autonomous driving can be achieved by combining the DAS functions in the limited situations such as on highways. However, in order to coordinate the DAS functions for autonomous driving, a supervisor…
Miwata, M; Tsuneyoshi, M; Tada, Y; Ikeda, M; Barolli, L	2021	Design of an Intelligent Driving Support System for Detecting Distracted Driving	COMPLEX, INTELLIGENT AND SOFTWARE INTENSIVE SYSTEMS, CISIS-2021	Proceedings Paper	In this paper, we propose an Artificial Intelligence (AI)-based driving support system for detecting distracted driving and increasing the safe driving. We classify the hands of driver and smartphones for detecting the distracted status. We evaluate the proposed system by experiments. The experimental results show that YOLOv5-based distracted driving detection method has a good performance.
Naveh, E; Marcus, A	2007	Financial performance, ISO 9000 standard and safe driving practices effects on accident rate in the US motor carrier industry	ACCIDENT ANALYSIS AND PREVENTION	Article	The question this research address is if voluntary certification with ISO 9000 standards can reduce the number of accidents large trucks have. Certification might have a positive effect depending upon the actions a company takes as a result of being certified, for instance, a company may change driver training and maintenance and how it carries out corrective action. We identified 40 ISO 9002: 19…
Nikulin, V	2016	Driving Style Identification with Unsupervised Learning	MACHINE LEARNING AND DATA MINING IN PATTERN RECOGNITION (MLDM 2016)	Proceedings Paper	One way to optimise insurance prices and policies is to collect and to analyse driving trajectories: sequences of 2D-points, where time distance between any two consequitive points is a constant. Suppose that most of the drivers have safe driving style with similar statistical characteristics. Using above assumption as a main ground, we shall go through the list of all drivers (available in the d…
Nousias, S; Tsehos, C; Bitzas, D; Amaxilatis, D; Montesa, J; Lalos, AS; Moustakas, K; Chatzigiannakis, I	2019	Exploiting Gamification to Improve Eco-driving Behaviour: The GamECAR Approach	ELECTRONIC NOTES IN THEORETICAL COMPUTER SCIENCE	Proceedings Paper	GamECAR aims to develop a highly innovative and interactive Serious Games platform that will empower and guide users to adopt an eco-friendly driving style. This will be achieved, without distracting them from safe driving, through a multidisciplinary approach aiming at the development of a user friendly, unobtrusive multi-player gaming environment, where the users will not only play collaborativ…
Nykanen, A; Lundkvist, A; Lindberg, S; Lopez, M	2016	SAFE AND SOUND DRIVE: SOUND BASED GAMIFICATION OF USER INTERFACES IN CARS	61ST AES INTERNATIONAL CONFERENCE ON AUDIO FOR GAMES	Proceedings Paper	The Safe and Sound Drive project concerns the design of an audio-only serious game for cars that will help drivers to increase eco-driving skills, lower fuel consumption and encourage safe and environmentally friendly approaches to driving. Methods and procedures for the design of sounds for audio-only user interfaces are reviewed and discussed, and design work and preliminary results from user s…
Olson, R; Anger, WK; Elliot, DL; Wipfli, B; Gray, M	2009	A New Health Promotion Model for Lone Workers: Results of the Safety & Health Involvement For Truckers (SHIFT) Pilot Study	JOURNAL OF OCCUPATIONAL AND ENVIRONMENTAL MEDICINE	Article	Objective: This study was designed to evaluate the effectiveness of a new health promotion model for tone workers. Methods: A single group pre- or postlest design was used to evaluate intervention effectiveness for reducing body weight and increasing healthful and safe behaviors. Truck drivers (n = 29) from four companies participated in a 6-month intervention involving a weight loss and safe dri…
Omar, SMHS; Fakharuzi, MHAM; Arshad, NM; Ward, TA	2013	Development of an Energy Efficient Driving Strategy for a Fuel Cell Vehicle over a Fixed Distance and Average Velocity	2013 IEEE CONFERENCE ON SYSTEMS, PROCESS & CONTROL (ICSPC)	Proceedings Paper	This paper examines the energy efficiency of a hydrogen fuel cell vehicle operating at different power settings. The goal is to develop a driving strategy to maximize energy efficiency for a fixed distance and average velocity. The test vehicle is equipped with a proton exchange membrane (PEM) fuel cell system that provides electric power to a brushless DC motor. This vehicle was designed to comp…
Paranthaman, PK; Dange, GR; Bellotti, F; Berta, R; De Gloria, A	2016	Gamification of Car Driver Performance	GAMES AND LEARNING ALLIANCE, GALA 2016	Proceedings Paper	The potential of serious games can be used to captivate the road users in exhibiting green driving behavior. Serious games can be an engaging medium in conveying information effectively. We exploited the pervasiveness of smartphone and serious games concept to develop a gamified environment for the road users. Our approach comprises two games that would gamify the driver performance based on the …
Pietra, A; Rull, MV; Etzi, R; Gallace, A; Scurati, GW; Ferrise, F; Bordegoni, M	2021	Promoting eco-driving behavior through multisensory stimulation: a preliminary study on the use of visual and haptic feedback in a virtual reality driving simulator	VIRTUAL REALITY	Article	This paper describes the design and preliminary test of a virtual reality driving simulator capable of conveying haptic and visual messages to promote eco-sustainable driving behavior. The driving simulator was implemented through the Unity game engine; a large street environment, including high-speed and urban sections, was created to examine different driving behaviors. The hardware setup inclu…
Pilkington-Cheney, F; Afghari, AP; Filtness, A; Papadimitriou, E; Lourenco, A; Brijs, T	2021	The i-DREAMS intervention strategies to reduce driver fatigue and sleepiness for different transport modes	2021 7TH INTERNATIONAL CONFERENCE ON MODELS AND TECHNOLOGIES FOR INTELLIGENT TRANSPORTATION SYSTEMS (MT-ITS)	Proceedings Paper	Driver sleepiness and fatigue are important contributors to many transport incidents and significantly increase crash risk. Recently, detection systems have been developed which aim to monitor the state of the driver and detect increasing levels of fatigue. However, there has been less focus on appropriate intervention strategies for drivers once fatigue and sleepiness have been detected. This pa…
Plechawska-Wojcik, M; Drozdzyk, T; Kaczorowska, M; Tokovarov, M	2020	GAMIFICATION AS A TOOL PROMOTING A PRO-ECOLOGICAL ATTITUDE AMONG DRIVERS	14TH INTERNATIONAL TECHNOLOGY, EDUCATION AND DEVELOPMENT CONFERENCE (INTED2020)	Proceedings Paper	Gamification finds progressively more interest in the field of education. The authors present the application of gamificional concept in promoting eco-friendly way of driving thus helping to educate people regarding pro-ecological behaviour. Nowadays students often use cars so the topic of pro-ecological driving style is very important for environment. The main objective of the project was to dev…
Prendinger, H; Oliveira, J; Catarino, J; Madruga, M; Prada, R	2014	iCO(2): A Networked Game for Collecting Large-Scale Eco-Driving Behavior Data	IEEE INTERNET COMPUTING	Article	The iCO(2) game collects human driving behavior data at scale and better illuminates user behaviors, including which eco-driving practices drivers apply. The game uses the Distributed Virtual Environments (DiVE) networking framework for multiuser 3D virtual world applications. Tests of DiVE's area of interest method showed promising results on two important metrics: bandwidth and frames per secon…
Prendinger, H; Puntumapon, K; Madruga, M	2016	Extending Real-Time Challenge Balancing to Multiplayer Games: A Study on Eco-Driving	IEEE TRANSACTIONS ON COMPUTATIONAL INTELLIGENCE AND AI IN GAMES	Article	Multiplayer games are an important and popular game mode for networked players. Since games are played by a diverse audience, it is important to scale the difficulty, or challenge, according to the skill level of the players. However, current approaches to real-time challenge balancing (RCB) in games are only applicable to single-player scenarios. In multiplayer scenarios, players with different …
Putnam, C; Anderson, DC; Hosley, W; Cheng, JH; Goldman, L	2017	Cognitive Rehabilitation Potential of a Driving Simulation Game for Brain Injury: A Pilot Study	EXTENDED ABSTRACTS PUBLICATION OF THE ANNUAL SYMPOSIUM ON COMPUTER-HUMAN INTERACTION IN PLAY (CHI PLAY'17 EXTENDED ABSTRACTS)	Proceedings Paper	The aim of this exploratory work was to examine how a driving simulation game might provide Speech Language Pathologists (SLPs) with an additional evidence-based commercial game option when working with their patients who have had a brain injury (BI). Research has indicated that cognitive skills required for safe driving are aligned with top SLP goals. Seven participants who had a BI played Xbox …
Rodrigues, MAF; Macedo, DV; Serpa, YR; Serpa, YR	2015	Beyond Fun: An Interactive and Educational 3D Traffic Rules Game Controlled by Non-traditional Devices	30TH ANNUAL ACM SYMPOSIUM ON APPLIED COMPUTING, VOLS I AND II	Proceedings Paper	In this work, we present an interactive and educational 3D traffic rules game controlled by non-traditional devices (steering wheel, joystick, tablet and smartphone), besides the traditional keyboard. In particular, both the tablet and the smartphone simulate the wheel of a driving school vehicle. In the game, the player must drive safely in traffic, respecting pedestrians, vehicles, traffic sign…
Sezgin, E; Lin, S	2019	Technology-Based Interventions, Assessments, and Solutions for Safe Driving Training for Adolescents: Rapid Review	JMIR MHEALTH AND UHEALTH	Review	Background: Safe driving training for adolescents aims to prevent injury and promote their well-being. In that regard, information and communication technologies have been used to understand adolescent driving behavior and develop interventions. Objective: The purpose of this review is to explore and discuss existing approaches to technology-based driving interventions, driving assessments, and s…
Soriguera, F; Miralles, E	2016	Driver feedback mobile app	EFFICIENT, SAFE AND INTELLIGENT TRANSPORT	Proceedings Paper	This paper faces the human factor in driving and its consequences for road safety. It presents the concepts behind the development of a smartphone app capable of evaluating drivers' performance. The app provides feedback to the driver in terms of a grade (between 0 and 10) depending on the aggressiveness and risks taken while driving. These are computed from the cumulative probability distributio…
Steinberger, F; Proppe, P; Schroeter, R; Alt, F	2016	CoastMaster: An Ambient Speedometer to Gamify Safe Driving	8TH INTERNATIONAL CONFERENCE ON AUTOMOTIVE USER INTERFACES AND INTERACTIVE VEHICULAR APPLICATIONS (AUTOMOTIVEUI 2016)	Proceedings Paper	We present CoastMaster, a smartphone application that serves as an ambient speedometer and driving game display. Our work is motivated by the need to re-engage drivers in the driving task, e.g., in situations where manoeuvering the vehicle is straightforward and does not require high levels of engagement. CoastMaster supports drivers during speed limit changes by (a) re-engaging them in the drivi…	Duplicate - Reports same data as Steinberger 2017
Steinberger, F; Schroeter, R; Foth, M; Johnson, D	2017	Designing Gamified Applications That Make Safe Driving More Engaging	PROCEEDINGS OF THE 2017 ACM SIGCHI CONFERENCE ON HUMAN FACTORS IN COMPUTING SYSTEMS (CHI'17)	Proceedings Paper	Low levels of engagement while driving can pose road safety risks, e.g., inattention during low traffic or routine trips. Interactive technologies that increase task engagement could therefore offer safety benefits, e.g., through performance feedback, increased challenge, and incentives. As a means to build upon these notions, we chose to explore gamification of the driving task. The research aim…
Steinberger, F; Schroeter, R; Watling, CN	2017	From road distraction to safe driving: Evaluating the effects of boredom and gamification on driving behaviour, physiological arousal, and subjective experience	COMPUTERS IN HUMAN BEHAVIOR	Article	Boredom and low levels of task engagement while driving can pose road safety risks, e.g., inattention during low traffic, routine trips, or semi-automated driving. Digital technology interventions that increase task engagement, e.g., through performance feedback, increased challenge, and incentives (often referred to as `gamification'), could therefore offer safety benefits. To explore the impact…
Stillwater, T; Kurani, KS	2013	Drivers discuss ecodriving feedback: Goal setting, framing, and anchoring motivate new behaviors	TRANSPORTATION RESEARCH PART F-TRAFFIC PSYCHOLOGY AND BEHAVIOUR	Article	Ecodriving, defined here as the adoption of energy efficient driving styles and practices (primarily moderating accelerations and decelerations, reducing top speeds, and improved maintenance practices), has long been recognized as a potential source of reductions in transportation energy use. Estimates of energy savings attributed to ecodriving range widely, from less than 5% to as high as 20% de…
Stinchcombe, A; Kadulina, Y; Lemieux, C; Aljied, R; Gagnon, S	2017	Driving is not a game: Video game experience is associated with risk-taking behaviours in the driving simulator	COMPUTERS IN HUMAN BEHAVIOR	Article	The purpose of the present investigation was to assess the impact of self-reported video games experience on performance in the driving simulator. Two simulator experiments were executed using convenience samples of young drivers who completed a simulated drive and a questionnaire that quantified their experience playing video games. In the first experiment, participants completed a comprehensive…
Sureeyatanapas, P; Poophiukhok, P; Pathumnakul, S	2018	Green initiatives for logistics service providers: An investigation of antecedent factors and the contributions to corporate goals	JOURNAL OF CLEANER PRODUCTION	Article	Concern for sustainability has become more intense among business practitioners due to increasing societal demand for environmental care. Product sellers nowadays cannot sustain themselves in the competitive market only from greening the manufacturing processes, but all parties across the supply chain are also driven to be 'green', even logistics service providers (LSPs). This study aims to provi…
Tselios, C; Nousias, S; Bitzas, D; Amaxilatis, D; Akrivopoulos, O; Lalos, AS; Moustakas, K; Chatzigiannakis, I	2019	Enhancing an Eco-Driving Gamification Platform Through Wearable and Vehicle Sensor Data Integration	AMBIENT INTELLIGENCE (AMI 2019)	Proceedings Paper	As road transportation has been identified as a major contributor of environmental pollution, motivating individuals to adopt a more eco-friendly driving style could have a substantial ecological as well as financial benefit. With gamification being an effective tool towards guiding targeted behavioural changes, the development of realistic frameworks delivering a high end user experience, become…
Vaezipour, A; Rakotonirainy, A; Haworth, N	2016	Design of a Gamified Interface to Improve Fuel Efficiency and Safe Driving	Design, User Experience, and Usability: Novel User Experiences, Pt II	Proceedings Paper	The increasing reliance on motor vehicles has negative effects on both human health and the environment. Improving driving style has been shown to be a particularly crucial and relatively quick step to reducing fuel consumption and vehicle emissions. In this paper, a series of conceptual designs of in-vehicle gamified interfaces were evaluated, with a particular focus on the ability to use such s…
Vaezipour, A; Rakotonirainy, A; Haworth, N; Delhomme, P	2019	A simulator study of the effect of incentive on adoption and effectiveness of an in-vehicle human machine interface	TRANSPORTATION RESEARCH PART F-TRAFFIC PSYCHOLOGY AND BEHAVIOUR	Article	Introduction: Rapid developments in transportation technologies, such as in-vehicle human-machine interfaces (HMI), have the potential to improve driving behaviour. However, the use of such approaches is typically voluntary and there are numerous barriers to their widespread implementation. The aim of the current paper is to evaluate the impact of monetary incentive combined with competition with…
Valencia-Payan, C; Munoz-Ordonez, J; Pencue-Fierro, L	2020	Driver-Assistant System Using Computer Vision and Machine Learning	REVISTA FACULTAD DE INGENIERIA, UNIVERSIDAD PEDAGOGICA Y TECNOLOGICA DE COLOMBIA	Article	Safety has been one of the key points in vehicle design, in this case one of its main objectives is to implement warning systems to notify the driver about inappropriate or atypical process in their driving process, trying to avoid accidents that affect their vehicle passengers, as well as inflicting damage on third parties. Day by day, more systems are created to monitor the environment around t…
Xu, C; Kang, Y; Tsujino, K; Lu, CW	2013	A head posture estimation method based on 3-D images measurement for intuitive human-system interaction	2013 INTERNATIONAL JOINT CONFERENCE ON AWARENESS SCIENCE AND TECHNOLOGY & UBI-MEDIA COMPUTING (ICAST-UMEDIA)	Proceedings Paper	Real-time detection of the person's head posture is very important in field such as safe driving of automobile, man-machine interface of game and robot, and so on. Some techniques about the posture estimation of driver's head are existed, like detecting the sight line from the position of the pupil and iris of the eyes, using the positional relationship between the eyes and nose, and so on. Howev…
Zdravkovic, S; Vujanovic, D; Stokic, M; Pamucar, D	2021	Evaluation of professional driver's eco-driving skills based on type-2 fuzzy logic model	NEURAL COMPUTING & APPLICATIONS	Article	Due to the great market competition, transport companies face the need to reduce their vehicle fleet costs. The vehicle fleet managers' actions on the driver's driving style to achieve fuel consumption savings are measures to increase the fleet's energy efficiency. The authors developed a model for evaluating driving style using a type-2 fuzzy logic system. The model comprehensively considers thr…
Zhao, C; Li, L; Pei, X; Li, ZH; Wang, FY; Wu, XB	2021	A comparative study of state-of-the-art driving strategies for autonomous vehicles	ACCIDENT ANALYSIS AND PREVENTION	Article	The autonomous vehicle is regarded as a promising technology with the potential to reshape mobility and solve many traffic issues, such as accessibility, efficiency, convenience, and especially safety. Many previous studies on driving strategies mainly focused on the low-level detailed driving behaviors or specific traffic scenarios but lacked the high-level driving strategy studies. Though resea…

## Sheet: EBSCO_39
EBS_DUP	Authors		Year	Title	Source	Document Type	Abstract
0	Ali, Nazam; Piantanakulchai, Mongkut. Songklanakarin Journal of Science & Technology. May/Jun2020, Vol. 42 Issue 3, p496-503. 8p. , Database: Academic Search Complete		2020	Self-reported inclination of heavy-duty vehicle drivers to adopt eco-driving in different motivation contexts.	Journal of Science & Technology	Academic Journal	Eco-driving is an emerging field of research. Due to its positive dimensions on fuel-economy and environmental emissions, it is becoming a well-known concept in transportation industry. Behavioral responses of drivers’ readiness to adopt eco-driving are studied. Questionnaires are collected from 87 truck drivers working for a logistics firm in Thailand. Eco-driving was introduced using three diff…
0	Anon (No authorship indicated); UMTRI Research Review, Vol 34(4), Oct-Dec, 2003 pp. 1-2. Publisher: University of Michigan Transportation Research Inst; [Journal Article], Database: APA PsycInfo		2003	Ready for the Road: Software Helps Teens Drive Safely.	UMTRI Research Review	Academic Journal	University of Michigan Transportation Research Institute (UMTRI) researchers recently evaluated a video game designed to give young drivers the opportunity to practice safe driving skills in a controlled environment where mistakes don't have harmful consequences. The study evaluated the effectiveness of the Road Ready StreetWise game in raising teen awareness of key driving risks; strengthening p…
0	Anon (TES: Times Educational Supplement). 4/24/2009, Issue 4836, special section p5-5. 4/5p. 1 Color Photograph. , Database: Academic Search Complete		2009	diary.	TES: Times Educational Supplement	Periodical	The article provides news briefs about schools, children and teachers in Great Britain. A Welsh physical education teacher has adapted the game Quidditch, in the Harry Potter novels by J.K. Rowling, to be played by school children. Children are delivering safe driving lectures to speeders in a program in Leicestershire, England. The Gala Coral Group gambling company offers a teachers' night in th…
0	Anon (TES: Times Educational Supplement). 6/21/2013, Issue 5049, p5-5. 1/2p. 2 Color Photographs, 1 Black and White Photograph. , Database: Academic Search Complete		2013	This week.	TES: Times Educational Supplement	Periodical	The article presents a calendar of events for the week of June 15-21, 2013 including the K-Music 2013 Korean music festival in London, England on the 15th, the Broadstairs Dickens Festival in England on the 16th, and the Formula Student Diesel Eco Driving Challenge on the 20th.
0	Chen, Chin-Ling; Shin, Jungpil; Tsai, Yu-Ting; Castiglione, Aniello; Palmieri, Francesco. International Journal of Foundations of Computer Science. Sep2017, Vol. 28 Issue 6, p781-797. 17p. DOI: 10.1142/S0129054117400184. , Database: Academic Search Complete		2017	Securing Information Exchange in VANETs by Using Pairing-Based Cryptography.	International Journal of Foundations of Computer Science	Academic Journal	Vehicular Ad Hoc Networks are mainly implemented to enable the interchange of huge amount of information among vehicles and between vehicles and control entities such as road side units or base stations, providing support for a comfortable and safe driving experience. However, due to the recent proliferation of cybersecurity threats, securing such a critical exchange of information becomes a fund…
0	Deveson, Tom. TES: Times Educational Supplement. 2/6/2004 Supplement, p13-13. 1/4p. , Database: Academic Search Complete		2004	FREE RESOURCES.	TES: Times Educational Supplement	Periodical	The article presents discusses about booklets related to food hygiene, safe driving and stealing of mobile phones. Two chefs view with one another in a spoof competition in which they are unknowingly guilty of a whole range of food safety errors. Pupils at stages 2 and 3 will enjoy watching for the "barf alerts" as hands are left unwashed, surfaces are wiped with dirty cloths and knives are wiped…
0	Gawron, James H.; Keoleian, Gregory A.; De Kleine, Robert D.; Wallington, Timothy J.; Kim, Hyung Chul. Transportation Research: Part D. Aug2019, Vol. 73, p130-141. 12p. DOI: 10.1016/j.trd.2019.06.007. , Database: Academic Search Complete		2019	Deep decarbonization from electrified autonomous taxi fleets: Life cycle assessment and case study in Austin, TX.	Transportation Research: Part D	Academic Journal	Indirect effects of autonomous vehicles are quantified at the mobility system level. • Higher utilization results in fuel efficiency gains due to faster fleet turnover. • Longer vehicle lifetimes reduce production burden per mile through amortization. • Autonomous taxis can reduce greenhouse gas emissions from urban person travel by 87%. Although recent studies of autonomous taxis (ATs) have begu…
0	HUTCHINS, AARON. Maclean's. 6/23/2014, Vol. 127 Issue 24, p38-38. 1p. 2 Color Photographs. , Database: Academic Search Complete		2014	Watch where you're going.	Maclean's	Periodical	The article discusses usage-based insurance (UBI) programs for automobiles, focusing on the potential privacy concerns associated with the tracking technology in Canada. Topics include UBI's aims of providing discounts to safe drivers and promoting aware driving habits, the use of the technology to track teenage or elderly drivers, and concerns over the services' system of judging safe driving.
0	Jeong, Mira; Ko, Byoung Chul. Sensors (14248220). Dec2018, Vol. 18 Issue 12, p4270. 1p. DOI: 10.3390/s18124270. , Database: Academic Search Complete		2018	Driver's Facial Expression Recognition in Real-Time for Safe Driving.	Sensors	Academic Journal	In recent years, researchers of deep neural networks (DNNs)-based facial expression recognition (FER) have reported results showing that these approaches overcome the limitations of conventional machine learning-based FER approaches. However, as DNN-based FER approaches require an excessive amount of memory and incur high processing costs, their application in various fields is very limited and d…
0	Kim, Hakjae; Oh, Ryong; Lee, Sungju; Kim, Taesup; Lee, Sangjoon; Chung, Yongwha; Cho, Choongho. Computer Standards & Interfaces. Nov2009, Vol. 31 Issue 6, p1098-1107. 10p. DOI: 10.1016/j.csi.2008.09.043. , Database: Academic Search Complete		2009	A fingerprint-based user authentication protocol considering both the mobility and security in the telematics environment	Computer Standards & Interfaces	Academic Journal	Abstract: With the advance of the Internet and mobile communication techniques, the telematics environment where users in vehicles can use the Internet service has been realized. For the safe driving, however, we propose that user authentication for the Internet service is performed by using the driver''s fingerprint, instead of typing his/her password. Since the driver''s fingerprint is private …
0	Mardi Z; Ashtiani SN; Mikaili M, Journal of medical signals and sensors [J Med Signals Sens], ISSN: 2228-7477, 2011 May; Vol. 1 (2), pp. 130-7; Publisher: Medknow Publications and Media Pvt. Ltd; PMID: 22606668, Database: MEDLINE		2011	EEG-based Drowsiness Detection for Safe Driving Using Chaotic Features and Statistical Tests.	Journal of medical signals and sensors	Academic Journal	Electro encephalography (EEG) is one of the most reliable sources to detect sleep onset while driving. In this study, we have tried to demonstrate that sleepiness and alertness signals are separable with an appropriate margin by extracting suitable features. So, first of all, we have recorded EEG signals from 10 volunteers. They were obliged to avoid sleeping for about 20 hours before the test. W…
0	Miotti, Marco; Needell, Zachary A.; Ramakrishnan, Sankaran; Heywood, John; Trancik, Jessika E. Transportation Research: Part D. Sep2021, Vol. 98, pN.PAG-N.PAG. 1p. DOI: 10.1016/j.trd.2021.102918. , Database: Academic Search Complete		2021	Quantifying the impact of driving style changes on light-duty vehicle fuel consumption.	Transportation Research: Part D	Academic Journal	We examine a set of four driving style heuristics implementable by human drivers. • These improvements are applied to a large set of representative drive cycles. • They can save the average US driver 6% fuel with a 1.5% increase in travel time. • Percentage fuel savings are consistent across locations and vehicle types. Modifying driving styles can help to reduce the energy use and emissions of d…
0	Rhodes L; Duignan F; Harris W; Rhodes, Linden; Duignan, Fiona; Harris, Wendy Health Promotion Journal of Australia, 2006 Apr; 17(1): 27-31. 5p. (journal article - research, tables/charts) ISSN: 1036-1073 PMID: NLM16619932, Database: CINAHL Plus with Full Text		2006	Playing the game on the World Wide Web.	Health Promotion Journal of Australia	Academic Journal	Issue Addressed: 'Celebrate - do it Safely' is a project aimed at reducing youth alcohol-related harm on the Central Coast, New South Wales (NSW). The primary focus for 2003 was to use the world wide web and the website www.celebratesafely.com.au to raise awareness and reinforce the message of how to party safely to young people.Methods: A creative, interactive website was set up to be a local an…
0	Sanguinetti, Angela; Queen, Ella; Yee, Christopher; Akanesuvan, Kantapon. Transportation Research: Part F. Apr2020, Vol. 70, p1-14. 14p. DOI: 10.1016/j.trf.2020.02.010. , Database: Academic Search Complete		2020	Average impact and important features of onboard eco-driving feedback: A meta-analysis.	Transportation Research: Part F	Academic Journal	Onboard eco-driving feedback improves fuel economy by 6.6% on average. • The impact of most onboard feedback tested to-date deteriorates over time. • Eco-driving feedback should include both fine- and course-grained information. • Eco-driving feedback should include performance standards. • Multimodal eco-driving feedback may be more effective than visual only. • Gamification may enhance eco-driv…
0	White Rabbit Productions. 2006. (DVD), Database: AgeLine		2006	Aging game.	White Rabbit Productions	Book	This quarterly television series, which was sponsored by AARP Utah, aired on Utah's statewide public television station, KUED-TV, in 2005-2006. Four 30-minute episodes are included on 1 videodisc: Mind and Body offers advice on maintaining a healthy mind and body; Who Do You Trust presents information on consumer fraud; Working Past Retirement reviews issues facing older workers; and On The Road …
0	Zamfolini Hallal, Camilla; Tavella Navega, Marcelo; Menezes Garcia Silva, José Adolfo; Hebling Spinoso, Deborah; Morcelli, Mary Hellen; Fernandes Crozara, Luciano; Ribeiro Marques, Nise Fisioterapia em Movimento, Jan-Mar2017; 30(1): 125-132. 8p. (Article - research, tables/charts) ISSN: 0103-5150, Database: CINAHL Plus with Full Text		2017	Do cognitive tasks during gait increase the risk of accidents with pedestrians? A study based on electromyographic parameters.	Fisioterapia em Movimento	Academic Journal	Introduction: Accidents involving pedestrians are responsible for many cases of serious injuries and deaths. Crossing streets safely requires complex planning and cognitive demand because it is necessary to perform more than one task at a time. Objective: The aim of this study was to identify electromyographic changes during gait in young subjects who performed the cognitive tasks concurrently. M…
1	Beloufa, Sabrina; Cauchard, Fabrice; Vedrenne, Joël; Vailleau, Benjamin; Kemeny, Andras; Mérienne, Frédéric; Boucheix, Jean-Michel. Transportation Research: Part F. Feb2019, Vol. 61, p201-216. 16p. DOI: 10.1016/j.trf.2017.11.010. , Database: Academic Search Complete			Learning eco-driving behaviour in a driving simulator: Contribution of instructional videos and interactive guidance system.		Academic Journal
1	Brouwer, R.F.T.; Stuiver, A.; Hof, T.; Kroon, L.; Pauwelussen, J.; Holleman, B. Transportation Research: Part C. Sep2015 Part D, Vol. 58, p760-771. 12p. DOI: 10.1016/j.trc.2015.04.027. , Database: Academic Search Complete			Personalised feedback and eco-driving: An explorative study.		Academic Journal
1	Cheng, Shuo; Li, Liang; Chen, Xiang; Fang, Sheng-nan; Wang, Xiang-yu; Wu, Xiu-heng; Li, Wei-bing. Applied Energy. Jun2020, Vol. 268, pN.PAG-N.PAG. 1p. DOI: 10.1016/j.apenergy.2020.115030. , Database: Academic Search Complete			Longitudinal autonomous driving based on game theory for intelligent hybrid electric vehicles with connectivity.		Academic Journal
1	Hinnant, J. Benjamin; Stavrinos, Despina. Transportation Research: Part F. Oct2020, Vol. 74, p272-279. 8p. DOI: 10.1016/j.trf.2020.08.028. , Database: Academic Search Complete			Rewards decrease risky decisions for adolescent drivers: Implications for crash prevention.		Academic Journal
1	Kountouriotis, Georgios K.; Wilkie, Richard M.; Gardner, Peter H.; Merat, Natasha. Transportation Research: Part F. Oct2015, Vol. 34, p108-121. 14p. DOI: 10.1016/j.trf.2015.07.012. , Database: Academic Search Complete			Looking and thinking when driving: The impact of gaze and cognitive load on steering.		Academic Journal
1	Li Q; Tay R, Accident; analysis and prevention [Accid Anal Prev], ISSN: 1879-2057, 2014 Apr; Vol. 65, pp. 8-10; Publisher: Pergamon Press; PMID: 24384385, Database: MEDLINE			Improving drivers' knowledge of road rules using digital games.		Academic Journal
0	Li, Qing; Tay, Richard. Accident Analysis & Prevention. Apr2014, Vol. 65, p8-10. 3p. DOI: 10.1016/j.aap.2013.12.003. , Database: Academic Search Complete			Improving drivers’ knowledge of road rules using digital games.	Accident Analysis & Prevention	Academic Journal
1	Ludwig, Timothy D.; Biggs, Jay; Wagner, Sandra; Geller, E. Scott. Journal of Organizational Behavior Management. 2001, Vol. 21 Issue 4, p75. 30p. 3 Charts, 16 Graphs. , Database: Academic Search Complete			Using Public Feedback and Competitive Rewards to Increase the Safe Driving of Pizza Deliverers.		Academic Journal
1	Ludwig, Timothy D.; Geller, E. Scott; Journal of Organizational Behavior Management, Vol 19(4), 2000 Special Issue: Intervening to improve the safety of occupational driving: A behavior-change model and review of empirical evidence. pp. 1-124. Publisher: Haworth Press; [Journal Article], Database: APA PsycInfo			Intervening to improve the safety of delivery drivers: A systematic behavioral approach.		Academic Journal
1	Makan, Hemisha; Heyns, Gert J. Journal of Transport & Supply Chain Management. 2018, Vol. 12, pN.PAG-N.PAG. 1p. DOI: 10.4102/jtscm.v12i0.365. , Database: Academic Search Complete			Sustainable supply chain initiatives in reducing greenhouse gas emission within the road freight industry.		Academic Journal
1	Massoud, Rana; Berta, Riccardo; Poslad, Stefan; De Gloria, Alessandro; Bellotti, Francesco; López, Jose Manuel Molina. Sensors (14248220). May2021, Vol. 21 Issue 10, p3559-3559. 1p. DOI: 10.3390/s21103559. , Database: Academic Search Complete			IoT Sensing for Reality-Enhanced Serious Games, a Fuel-Efficient Drive Use Case.		Academic Journal
1	Mcconky, Katie; Chen, Roger B.; Gavi, Glenn R. Transportation Research: Part F. Jan2018, Vol. 52, p62-74. 13p. DOI: 10.1016/j.trf.2017.11.013. , Database: Academic Search Complete			A comparison of motivational and informational contexts for improving eco-driving performance.		Academic Journal
1	Olson R; Anger WK; Elliot DL; Wipfli B; Gray M Journal of Occupational & Environmental Medicine, Nov2009; 51(11): 1233-1246. 14p. (Journal Article - research, tables/charts) ISSN: 1076-2752 PMID: NLM19858740, Database: CINAHL Plus with Full Text			A new health promotion model for lone workers: results of the Safety & Health Involvement For Truckers (SHIFT) pilot study.		Academic Journal
1	Olson R; Anger WK; Elliot DL; Wipfli B; Gray M, Journal of occupational and environmental medicine [J Occup Environ Med], ISSN: 1536-5948, 2009 Nov; Vol. 51 (11), pp. 1233-46; Publisher: Lippincott Williams & Wilkins; PMID: 19858740, Database: MEDLINE			A new health promotion model for lone workers: results of the Safety & Health Involvement For Truckers (SHIFT) pilot study.		Academic Journal
1	Sezgin E; Lin S, JMIR mHealth and uHealth [JMIR Mhealth Uhealth], ISSN: 2291-5222, 2019 Jan 24; Vol. 7 (1), pp. e11942; Publisher: JMIR Publications Inc; PMID: 30679149, Database: MEDLINE			Technology-Based Interventions, Assessments, and Solutions for Safe Driving Training for Adolescents: Rapid Review.		Academic Journal
1	Steinberger, Fabius; Schroeter, Ronald; Watling, Christopher N. Computers in Human Behavior. Oct2017, Vol. 75, p714-726. 13p. DOI: 10.1016/j.chb.2017.06.019. , Database: Academic Search Complete			From road distraction to safe driving: Evaluating the effects of boredom and gamification on driving behaviour, physiological arousal, and subjective experience.		Academic Journal
1	Stillwater, Tai; Kurani, Kenneth S.; Transportation Research Part F: Traffic Psychology and Behaviour, Vol 19, Jul, 2013 pp. 85-96. Publisher: Elsevier Science; [Journal Article], Database: APA PsycInfo			Drivers discuss ecodriving feedback: Goal setting, framing, and anchoring motivate new behaviors.		Academic Journal
1	Stinchcombe, Arne; Kadulina, Yara; Lemieux, Chantal; Aljied, Rumaisa; Gagnon, Sylvain. Computers in Human Behavior. Apr2017, Vol. 69, p415-420. 6p. DOI: 10.1016/j.chb.2016.12.006. , Database: Academic Search Complete			Driving is not a game: Video game experience is associated with risk-taking behaviours in the driving simulator.		Academic Journal
1	Sureeyatanapas, Panitas; Poophiukhok, Peerapat; Pathumnakul, Supachai. Journal of Cleaner Production. Aug2018, Vol. 191, p1-14. 14p. DOI: 10.1016/j.jclepro.2018.04.206. , Database: Academic Search Complete			Green initiatives for logistics service providers: An investigation of antecedent factors and the contributions to corporate goals.		Academic Journal
1	Vaezipour, Atiyeh; Rakotonirainy, Andry; Haworth, Narelle; Delhomme, Patricia. Transportation Research: Part F. Jan2019, Vol. 60, p383-398. 16p. DOI: 10.1016/j.trf.2018.10.030. , Database: Academic Search Complete			A simulator study of the effect of incentive on adoption and effectiveness of an in-vehicle human machine interface.		Academic Journal
1	Zdravkovi?, Stefan; Vujanovi?, Davor; Stoki?, Marko; Pamu?ar, Dragan. Neural Computing & Applications. Sep2021, Vol. 33 Issue 18, p11541-11554. 14p. DOI: 10.1007/s00521-021-05823-z. , Database: Academic Search Complete			Evaluation of professional driver's eco-driving skills based on type-2 fuzzy logic model.		Academic Journal
1	Zhao C; Li L; Pei X; Li Z; Wang FY; Wu X, Accident; analysis and prevention [Accid Anal Prev], ISSN: 1879-2057, 2021 Feb; Vol. 150, pp. 105937; Publisher: Pergamon Press; PMID: 33338914, Database: MEDLINE			A comparative study of state-of-the-art driving strategies for autonomous vehicles.		Academic Journal
1	Zhao, Can; Li, Li; Pei, Xin; Li, Zhiheng; Wang, Fei-Yue; Wu, Xiangbin. Accident Analysis & Prevention. Feb2021, Vol. 150, pN.PAG-N.PAG. 1p. DOI: 10.1016/j.aap.2020.105937. , Database: Academic Search Complete			A comparative study of state-of-the-art driving strategies for autonomous vehicles.		Academic Journal

## Sheet: Citation searches 15
Author	Year	Title
Ando (surname miscited as Ryosuke in some studies)	2010	Development of a system to promote eco-driving and safe-driving,” in Smart Spaces and Next Generation WiredWireless Networking, vol. 6294. Berlin/Heidelberg, Germany: Springer, 2010, pp. 207–218.
Belotti	2019	TEAM Applications for Collaborative Road Mobility
Ecker, R., Holzer, P., Broy, V., & Butz, A.	2011	EcoChallenge: A race for efficiency.	In Proceedings of the 13th international conference on human computer interaction with mobile devices and services (pp. 91e94). New York, NY, USA: ACM.
Krome	2014	Exploring game ideas for stresslessness in the automotive domain
Magana	2014	The Impact of Using Gamification on the Eco-driving Learning
McCall	2012	Gaming concepts and incentives to change driver behaviour
Rapp	2016	Gamification as a tool to encourage eco-driving	Master’s Degree Thesis Game and Software Engineering ISRN: BTH-AMT-EX--2016/CIM-16--SE
Reiner	2014	Collective data sharing to improve on driving efficiency and safety
Rodríguez, M.D., Roa, R.R., Ibarra, J.E., Curlango, C.M	2015	In-car ambient displays for safety driving gamification	In: Proceedings of the 5th Mexican Conference on Human-Computer Interaction, p. 26
Shi	2012	Routine Driving Infotainment App: Gamification of Performance Driving
Sundstrom	2012	The car as an arena for gaming
Tractinsky	2011	Examining Animation Aesthetics to Promote Eco-driving.
Vara	2011	Meeco: Gamifying ecology through a social networking platform
Loumidi, A. K., Mittag, S., Lathrop, W. B., & Althoff, F.	2011	Eco-driving incentives in the North American market.	Paper presented at the proceedings of the 3rd international conference on automotive user interfaces and interactive vehicular applications.
Stillwater, T	2011	Comprehending Consumption: The Behavioral Basis and Implementation of Driver Feedback for Reducing Vehicle Energy Use. PhD Dissertation, University of California, Davis.

## Sheet: Screened 102
Authors	Year	Title	Source	Document Type	Abstract	Fate Code	Fate Description
Ando (surname miscited as Ryosuke in some studies)	2010	Development of a system to promote eco-driving and safe-driving,” in Smart Spaces and Next Generation WiredWireless Networking, vol. 6294. Berlin/Heidelberg, Germany: Springer, 2010, pp. 207–218.				0	Final sample
Anon (No authorship indicated); UMTRI Research Review, Vol 34(4), Oct-Dec, 2003 pp. 1-2. Publisher: University of Michigan Transportation Research Inst; [Journal Article], Database: APA PsycInfo	2003	Ready for the Road: Software Helps Teens Drive Safely.	UMTRI Research Review	Academic Journal	University of Michigan Transportation Research Institute (UMTRI) researchers recently evaluated a video game designed to give young drivers the opportunity to practice safe driving skills in a controlled environment where mistakes don't have harmful consequences. The study evaluated the effectiveness of the Road Ready StreetWise game in raising teen awareness of key driving risks; strengthening p…	0	Final sample
Bahadoor, K; Hosein, P	2016	Application for the Detection of Dangerous Driving and an Associated Gamification Framework	2016 IEEE 4TH INTERNATIONAL CONFERENCE ON FUTURE INTERNET OF THINGS AND CLOUD WORKSHOPS (FICLOUDW)	Proceedings Paper	In today's highly technology-based world, wireless devices such as smartphones, are being utilized for solving daily problems and in making our daily lives more efficient. Although smartphones are sometimes to be blamed for vehicular accidents, they can also be used for helping to avoid accidents. In this paper we consider one such possible solution (called Project Drive), in which a smartphone b…	0	Final sample
Belotti	2019	TEAM Applications for Collaborative Road Mobility				0	Final sample
Beloufa, S; Cauchard, F; Vedrenne, J; Vailleau, B; Kemeny, A; Merienne, F; Boucheix, JM	2019	Learning eco-driving behaviour in a driving simulator: Contribution of instructional videos and interactive guidance system	TRANSPORTATION RESEARCH PART F-TRAFFIC PSYCHOLOGY AND BEHAVIOUR	Article	The present paper deals with how to design and test an eco-driving training tool in the form of a digital educational game, including a specific guidance system interface to teach eco-driving rules. We tested whether learners could reproduce the eco-driving behaviour and implement the rules once they were autonomous. We also aimed to validate the method as a relevant eco-driving teaching tool tha…	0	Final sample
Brouwer, RFT; Stuiver, A; Hof, T; Kroon, L; Pauwelussen, J; Holleman, B	2015	Personalised feedback and eco-driving: An explorative study	TRANSPORTATION RESEARCH PART C-EMERGING TECHNOLOGIES	Article	Conventional road transport has negative impact on the environment. Stimulating eco-driving through feedback to the driver about his/her energy conservation performance has the potential to reduce CO2 emissions and promote fuel cost savings. Not all drivers respond well to the same type of feedback. Research has shown that different drivers are attracted to different types of information and feed…	0	Final sample
Dange, GR; Paranthaman, PK; Bellotti, F; Samaritani, M; Berta, R; De Gloria, A	2017	Assessment of Driver Behavior Based on Machine Learning Approaches in a Social Gaming Scenario	APPLICATIONS IN ELECTRONICS PERVADING INDUSTRY, ENVIRONMENT AND SOCIETY	Proceedings Paper	The estimation of user performance analytics in the area of car driver performance was carried out in this paper. The main focus relies on the descriptive analysis with our approaches emphasizing on educational serious games, in order to improvise the driver's behavior (specifically green driving) in a pleasant and challenging way. We also propose a general Internet of the Things (IoT) social gam…	0	Final sample
Degirmenci, K	2018	Toward a Gamified Mobile Application to Improve Eco-Driving: A Design and Evaluation Approach Emergent Research Forum (ERF)	AMCIS 2018 PROCEEDINGS	Proceedings Paper	The design and adoption of gamified information systems have been increasingly discussed in various fields of application such as education, health, crowdsourcing, or sustainability. We focus on the field of environmental sustainability and follow a design science research approach to develop and evaluate an instantiation of an artifact in the form of a gamified mobile application that supports e…	0	Final sample
Ecker, R., Holzer, P., Broy, V., & Butz, A.	2011	EcoChallenge: A race for efficiency.				0	Final sample
Gardelis, K; Lalos, AS; Moustakas, K	2018	Development of an Eco-Driving Simulation Training System with Natural and Haptic Interaction in Virtual Reality Environments	VISIGRAPP 2018: PROCEEDINGS OF THE 13TH INTERNATIONAL JOINT CONFERENCE ON COMPUTER VISION, IMAGING AND COMPUTER GRAPHICS THEORY AND APPLICATIONS - VOL 2: HUCAPP	Proceedings Paper	Road transport is one of the major causes of the environmental pollution. Among the actions individuals can take to reduce their green-house gases associated with personal transportation, there is to operate their current vehicles more efficiently. Behavioral theory strongly confirms that the most important educational element in changing driver behavior is the direct feedback while driving on an…	0	Final sample
Gunther, M; Kacperski, C; Krems, JF	2020	Can electric vehicle drivers be persuaded to eco-drive? A field study of feedback, gamification and financial rewards in Germany	ENERGY RESEARCH & SOCIAL SCIENCE	Article	Promoting eco-driving with battery electric vehicles (BEVs) can help drivers reduce their average energy consumption and enhance the driving range of a BEV. The present study examined the influence of three persuasive strategies (feedback regarding energy consumption, gamification, and financial rewards) compared to a baseline condition (no feedback or intervention) on the average BEV energy cons…	0	Final sample
Hollerit, B; Prendinger, H; Jain, R; Fontes, D; Campos, H; Damas, H; Fang, AJ; Prada, R; Cavazza, M	2021	Implementation and Analytics of the Distributed Eco-Driving Simulation iCO(2)	IEEE ACCESS	Article	We describe iCO(2), a simulation platform for collecting driving behavior data. It is designed as the first massively multiplayer online game for mobile devices to practice eco-friendly driving. It facilitates the collection of large-scale data on driving behavior to better understand compliance and incentive mechanisms for eco-driving and users' preferences. We present the results of a campaign …	0	Final sample
Klemke, R; Kravcik, M; Bohuschke, F	2014	Energy-Efficient and Safe Driving Using a Situation-Aware Gamification Approach in Logistics	GAMES AND LEARNING ALLIANCE	Proceedings Paper	Safety and energy-efficiency is the main aim of every reasonable driver. But often there is too much relevant information a driver has to take into account and evaluate. A useful support can be provided by technology that can observe the driver's situation, analyze it, and offer individualized information and services to the driver. Moreover, by means of gamification mechanisms drivers can receiv…	0	Final sample
Krome	2014	Exploring game ideas for stresslessness in the automotive domain				0	Final sample
Loumidi, A. K., Mittag, S., Lathrop, W. B., & Althoff, F.	2011	Eco-driving incentives in the North American market.				0	Final sample
Magana	2014	The Impact of Using Gamification on the Eco-driving Learning				0	Final sample
Magana, VC; Munoz-Organero, M	2015	GAFU: Using a Gamification Tool to Save Fuel	IEEE INTELLIGENT TRANSPORTATION SYSTEMS MAGAZINE	Article	In this paper, we propose, implement and user-validate a training tool for saving fuel that uses some elements from games in order to promote efficient driving and provide feedback to the user. The proposed system uses a fuzzy logic system in order to assess the driving style from the point of view of the fuel consumption. The output is a score between 0 (not efficient) and 10 (efficient). This v…	0	Final sample
Magana, VC; Organero, MM	2013	GAFU: A game to save fuel using social networks	2013 INTERNATIONAL CONFERENCE ON CONNECTED VEHICLES AND EXPO (ICCVE)	Proceedings Paper	In this paper, we propose a social game to promote efficient driving and provide feedback to the user. The proposed system uses a fuzzy logic system in order to assess the driving style from the point of view of the fuel consumption. The output is a score between 0 (not efficient) and 10 (efficient). This value can be compared with the score from other users of the social network that have simila…	0	Final sample
McCall	2012	Gaming concepts and incentives to change driver behaviour				0	Final sample
McConky, K; Chen, RB; Gavi, GR	2018	A comparison of motivational and informational contexts for improving eco-driving performance	TRANSPORTATION RESEARCH PART F-TRAFFIC PSYCHOLOGY AND BEHAVIOUR	Article	Eco-driving, the practice of operating a vehicle with environmentally friendly objectives, has been the focus of an increasing number of driving studies over the past decade, as new forms of vehicle automation and more driver-centric feedback continually emerge. Common benefits range from reducing carbon footprints and emissions to better fuel economy. Studies have also examined the effectiveness…	0	Final sample
Nousias, S; Tsehos, C; Bitzas, D; Amaxilatis, D; Montesa, J; Lalos, AS; Moustakas, K; Chatzigiannakis, I	2019	Exploiting Gamification to Improve Eco-driving Behaviour: The GamECAR Approach	ELECTRONIC NOTES IN THEORETICAL COMPUTER SCIENCE	Proceedings Paper	GamECAR aims to develop a highly innovative and interactive Serious Games platform that will empower and guide users to adopt an eco-friendly driving style. This will be achieved, without distracting them from safe driving, through a multidisciplinary approach aiming at the development of a user friendly, unobtrusive multi-player gaming environment, where the users will not only play collaborativ…	0	Final sample
Paranthaman, PK; Dange, GR; Bellotti, F; Berta, R; De Gloria, A	2016	Gamification of Car Driver Performance	GAMES AND LEARNING ALLIANCE, GALA 2016	Proceedings Paper	The potential of serious games can be used to captivate the road users in exhibiting green driving behavior. Serious games can be an engaging medium in conveying information effectively. We exploited the pervasiveness of smartphone and serious games concept to develop a gamified environment for the road users. Our approach comprises two games that would gamify the driver performance based on the …	0	Final sample
Prendinger, H; Oliveira, J; Catarino, J; Madruga, M; Prada, R	2014	iCO(2): A Networked Game for Collecting Large-Scale Eco-Driving Behavior Data	IEEE INTERNET COMPUTING	Article	The iCO(2) game collects human driving behavior data at scale and better illuminates user behaviors, including which eco-driving practices drivers apply. The game uses the Distributed Virtual Environments (DiVE) networking framework for multiuser 3D virtual world applications. Tests of DiVE's area of interest method showed promising results on two important metrics: bandwidth and frames per secon…	0	Final sample
Rapp	2016	Gamification as a tool to encourage eco-driving				0	Final sample
Reiner	2014	Collective data sharing to improve on driving efficiency and safety				0	Final sample
Rodrigues, MAF; Macedo, DV; Serpa, YR; Serpa, YR	2015	Beyond Fun: An Interactive and Educational 3D Traffic Rules Game Controlled by Non-traditional Devices	30TH ANNUAL ACM SYMPOSIUM ON APPLIED COMPUTING, VOLS I AND II	Proceedings Paper	In this work, we present an interactive and educational 3D traffic rules game controlled by non-traditional devices (steering wheel, joystick, tablet and smartphone), besides the traditional keyboard. In particular, both the tablet and the smartphone simulate the wheel of a driving school vehicle. In the game, the player must drive safely in traffic, respecting pedestrians, vehicles, traffic sign…	0	Final sample
Rodríguez, M.D., Roa, R.R., Ibarra, J.E., Curlango, C.M	2015	In-car ambient displays for safety driving gamification				0	Final sample
Shi	2012	Routine Driving Infotainment App: Gamification of Performance Driving				0	Final sample
Soriguera, F; Miralles, E	2016	Driver feedback mobile app	EFFICIENT, SAFE AND INTELLIGENT TRANSPORT	Proceedings Paper	This paper faces the human factor in driving and its consequences for road safety. It presents the concepts behind the development of a smartphone app capable of evaluating drivers' performance. The app provides feedback to the driver in terms of a grade (between 0 and 10) depending on the aggressiveness and risks taken while driving. These are computed from the cumulative probability distributio…	0	Final sample
Steinberger, F; Schroeter, R; Foth, M; Johnson, D	2017	Designing Gamified Applications That Make Safe Driving More Engaging	PROCEEDINGS OF THE 2017 ACM SIGCHI CONFERENCE ON HUMAN FACTORS IN COMPUTING SYSTEMS (CHI'17)	Proceedings Paper	Low levels of engagement while driving can pose road safety risks, e.g., inattention during low traffic or routine trips. Interactive technologies that increase task engagement could therefore offer safety benefits, e.g., through performance feedback, increased challenge, and incentives. As a means to build upon these notions, we chose to explore gamification of the driving task. The research aim…	0	Final sample
Steinberger, F; Schroeter, R; Watling, CN	2017	From road distraction to safe driving: Evaluating the effects of boredom and gamification on driving behaviour, physiological arousal, and subjective experience	COMPUTERS IN HUMAN BEHAVIOR	Article	Boredom and low levels of task engagement while driving can pose road safety risks, e.g., inattention during low traffic, routine trips, or semi-automated driving. Digital technology interventions that increase task engagement, e.g., through performance feedback, increased challenge, and incentives (often referred to as `gamification'), could therefore offer safety benefits. To explore the impact…	0	Final sample
Stillwater, T	2011	Comprehending Consumption: The Behavioral Basis and Implementation of Driver Feedback for Reducing Vehicle Energy Use. PhD Dissertation, University of California, Davis.				0	Final sample
Stillwater, T; Kurani, KS	2013	Drivers discuss ecodriving feedback: Goal setting, framing, and anchoring motivate new behaviors	TRANSPORTATION RESEARCH PART F-TRAFFIC PSYCHOLOGY AND BEHAVIOUR	Article	Ecodriving, defined here as the adoption of energy efficient driving styles and practices (primarily moderating accelerations and decelerations, reducing top speeds, and improved maintenance practices), has long been recognized as a potential source of reductions in transportation energy use. Estimates of energy savings attributed to ecodriving range widely, from less than 5% to as high as 20% de…	0	Final sample
Sundstrom	2012	The car as an arena for gaming				0	Final sample
Tractinsky	2011	Examining Animation Aesthetics to Promote Eco-driving.				0	Final sample
Tselios, C; Nousias, S; Bitzas, D; Amaxilatis, D; Akrivopoulos, O; Lalos, AS; Moustakas, K; Chatzigiannakis, I	2019	Enhancing an Eco-Driving Gamification Platform Through Wearable and Vehicle Sensor Data Integration	AMBIENT INTELLIGENCE (AMI 2019)	Proceedings Paper	As road transportation has been identified as a major contributor of environmental pollution, motivating individuals to adopt a more eco-friendly driving style could have a substantial ecological as well as financial benefit. With gamification being an effective tool towards guiding targeted behavioural changes, the development of realistic frameworks delivering a high end user experience, become…	0	Final sample
Vaezipour, A; Rakotonirainy, A; Haworth, N	2016	Design of a Gamified Interface to Improve Fuel Efficiency and Safe Driving	Design, User Experience, and Usability: Novel User Experiences, Pt II	Proceedings Paper	The increasing reliance on motor vehicles has negative effects on both human health and the environment. Improving driving style has been shown to be a particularly crucial and relatively quick step to reducing fuel consumption and vehicle emissions. In this paper, a series of conceptual designs of in-vehicle gamified interfaces were evaluated, with a particular focus on the ability to use such s…	0	Final sample
Vaezipour, A; Rakotonirainy, A; Haworth, N; Delhomme, P	2019	A simulator study of the effect of incentive on adoption and effectiveness of an in-vehicle human machine interface	TRANSPORTATION RESEARCH PART F-TRAFFIC PSYCHOLOGY AND BEHAVIOUR	Article	Introduction: Rapid developments in transportation technologies, such as in-vehicle human-machine interfaces (HMI), have the potential to improve driving behaviour. However, the use of such approaches is typically voluntary and there are numerous barriers to their widespread implementation. The aim of the current paper is to evaluate the impact of monetary incentive combined with competition with…	0	Final sample
Vara	2011	Meeco: Gamifying ecology through a social networking platform				0	Final sample
Angelis, S; Johnsson, A; Klomp, M; Hansson, R; Katzourakis, D	2016	Virtual brake software release	DYNAMICS OF VEHICLES ON ROADS AND TRACKS	Proceedings Paper	The ever-increasing competitive automotive market has stimulated manufacturers to develop vehicles that have to excel in terms of safety, design, sustainability and driving pleasure. It is therefore imperative for manufacturers to adopt sophisticated development processes and a well laid-out product lifecycle management plan to ensure their seamless presence in the market. Full exploitation of si…	1	Failed title screen
Anon (TES: Times Educational Supplement). 4/24/2009, Issue 4836, special section p5-5. 4/5p. 1 Color Photograph. , Database: Academic Search Complete	2009	diary.	TES: Times Educational Supplement	Periodical	The article provides news briefs about schools, children and teachers in Great Britain. A Welsh physical education teacher has adapted the game Quidditch, in the Harry Potter novels by J.K. Rowling, to be played by school children. Children are delivering safe driving lectures to speeders in a program in Leicestershire, England. The Gala Coral Group gambling company offers a teachers' night in th…	1	Failed title screen
Anon (TES: Times Educational Supplement). 6/21/2013, Issue 5049, p5-5. 1/2p. 2 Color Photographs, 1 Black and White Photograph. , Database: Academic Search Complete	2013	This week.	TES: Times Educational Supplement	Periodical	The article presents a calendar of events for the week of June 15-21, 2013 including the K-Music 2013 Korean music festival in London, England on the 15th, the Broadstairs Dickens Festival in England on the 16th, and the Formula Student Diesel Eco Driving Challenge on the 20th.	1	Failed title screen
Chen, JN; Zhang, C; Luo, JT; Xie, JF; Wan, Y	2020	Driving Maneuvers Prediction Based Autonomous Driving Control by Deep Monte Carlo Tree Search	IEEE TRANSACTIONS ON VEHICULAR TECHNOLOGY	Article	Autonomous driving has attracted significant attention in recent years. With the booming of artificial intelligence (AI), deep learning technologies have been applied to autonomous driving to help vehicles better perceive the environment. Besides the perceiving environment, predictive driving is another prominent smooth control and safe driving skill for human drivers. In this work, we develop a …	1	Failed title screen
Deng, C; Liu, G; Jia, AQ; Wen, X; Ma, K; Ying, BS	2021	Study on LiDAR Obstacle Detection for FSAC Racing Car Chiji	2021 4TH INTERNATIONAL CONFERENCE ON INTELLIGENT AUTONOMOUS SYSTEMS (ICOIAS 2021)	Proceedings Paper	Environmental perception is the premise of autonomous driving. Aiming at the environmental perception technology of racing car, this paper studies the LiDAR obstacle detection algorithm, aiming at providing necessary information for the path planning and vehicle control of racing car, and realizing the safe driving of the car. An algorithm of target pile bucket detection of driverless formula rac…	1	Failed title screen
Deveson, Tom. TES: Times Educational Supplement. 2/6/2004 Supplement, p13-13. 1/4p. , Database: Academic Search Complete	2004	FREE RESOURCES.	TES: Times Educational Supplement	Periodical	The article presents discusses about booklets related to food hygiene, safe driving and stealing of mobile phones. Two chefs view with one another in a spoof competition in which they are unknowingly guilty of a whole range of food safety errors. Pupils at stages 2 and 3 will enjoy watching for the "barf alerts" as hands are left unwashed, surfaces are wiped with dirty cloths and knives are wiped…	1	Failed title screen
Donatantonio, F; D'Amato, A; Arsie, I; Pianese, C	2018	A multi-layer control hierarchy for heavy duty vehicles with off-line dual stage dynamic programming optimization	TRANSPORTATION RESEARCH PART C-EMERGING TECHNOLOGIES	Article	In this paper, a multi-level, comprehensive control technique for a heavy duty vehicle, capable of reducing fuel consumption while complying with engine constraints on both operating conditions and smoke emissions has been developed. The higher control layer, using road data, engine and vehicle parameters, computes the optimal speed and gear shifting profiles through an off-line, dual step dynami…	1	Failed title screen
Gawron, James H.; Keoleian, Gregory A.; De Kleine, Robert D.; Wallington, Timothy J.; Kim, Hyung Chul. Transportation Research: Part D. Aug2019, Vol. 73, p130-141. 12p. DOI: 10.1016/j.trd.2019.06.007. , Database: Academic Search Complete	2019	Deep decarbonization from electrified autonomous taxi fleets: Life cycle assessment and case study in Austin, TX.	Transportation Research: Part D	Academic Journal	Indirect effects of autonomous vehicles are quantified at the mobility system level. • Higher utilization results in fuel efficiency gains due to faster fleet turnover. • Longer vehicle lifetimes reduce production burden per mile through amortization. • Autonomous taxis can reduce greenhouse gas emissions from urban person travel by 87%. Although recent studies of autonomous taxis (ATs) have begu…	1	Failed title screen
Guo, JX	2019	Design of the Downhill Automatic Liquid Damping Reduction Mechanism on the carbon-free car	2018 4TH INTERNATIONAL CONFERENCE ON ENVIRONMENTAL SCIENCE AND MATERIAL APPLICATION	Proceedings Paper	The carbon-free car is driven by gravity potential energy, through the mechanism to complete the specific direction control and avoid obstacles, to achieve the driving purpose of the car. The event is a national science and technology innovation activity project organized by relevant departments. It is a competition that demonstrates the engineering training and comprehensive ability of college s…	1	Failed title screen
Huang, TH; Nikulin, V; Chen, LB	2016	Detection of Abnormalities in Driving Style Based on Moving Object Trajectories without Labels	PROCEEDINGS 2016 5TH IIAI INTERNATIONAL CONGRESS ON ADVANCED APPLIED INFORMATICS IIAI-AAI 2016	Proceedings Paper	Being able automatically recognize the driving style is a very important and challenging task with many practical applications, including insurance. Note that hand labelling of the driving trajectories represents a very time-consuming task. To overcome this problem, we can reduce thousands of variable-length trajectories to the traditional rectangular format, using quantile-based technique. After…	1	Failed title screen
Jeong, Mira; Ko, Byoung Chul. Sensors (14248220). Dec2018, Vol. 18 Issue 12, p4270. 1p. DOI: 10.3390/s18124270. , Database: Academic Search Complete	2018	Driver's Facial Expression Recognition in Real-Time for Safe Driving.	Sensors	Academic Journal	In recent years, researchers of deep neural networks (DNNs)-based facial expression recognition (FER) have reported results showing that these approaches overcome the limitations of conventional machine learning-based FER approaches. However, as DNN-based FER approaches require an excessive amount of memory and incur high processing costs, their application in various fields is very limited and d…	1	Failed title screen
Kim, Hakjae; Oh, Ryong; Lee, Sungju; Kim, Taesup; Lee, Sangjoon; Chung, Yongwha; Cho, Choongho. Computer Standards & Interfaces. Nov2009, Vol. 31 Issue 6, p1098-1107. 10p. DOI: 10.1016/j.csi.2008.09.043. , Database: Academic Search Complete	2009	A fingerprint-based user authentication protocol considering both the mobility and security in the telematics environment	Computer Standards & Interfaces	Academic Journal	Abstract: With the advance of the Internet and mobile communication techniques, the telematics environment where users in vehicles can use the Internet service has been realized. For the safe driving, however, we propose that user authentication for the Internet service is performed by using the driver''s fingerprint, instead of typing his/her password. Since the driver''s fingerprint is private …	1	Failed title screen
Mardi Z; Ashtiani SN; Mikaili M, Journal of medical signals and sensors [J Med Signals Sens], ISSN: 2228-7477, 2011 May; Vol. 1 (2), pp. 130-7; Publisher: Medknow Publications and Media Pvt. Ltd; PMID: 22606668, Database: MEDLINE	2011	EEG-based Drowsiness Detection for Safe Driving Using Chaotic Features and Statistical Tests.	Journal of medical signals and sensors	Academic Journal	Electro encephalography (EEG) is one of the most reliable sources to detect sleep onset while driving. In this study, we have tried to demonstrate that sleepiness and alertness signals are separable with an appropriate margin by extracting suitable features. So, first of all, we have recorded EEG signals from 10 volunteers. They were obliged to avoid sleeping for about 20 hours before the test. W…	1	Failed title screen
Maruyama, H; Saito, Y; Yamada, M	2016	An analysis of changes in attention based on miniature eye movements	2016 11TH INTERNATIONAL CONFERENCE ON COMPUTER SCIENCE & EDUCATION (ICCSE)	Proceedings Paper	Understanding the mental state of the driver is important in supporting safe driving. We examined miniature eye movements, focusing in particular on microsaccades, which increase when the driver turns his or her attention to a visual target. Standard deviations in miniature eye movements increased after passing a traffic sign when measured using a simple game-style eye movement detecting system.	1	Failed title screen
Nikulin, V	2016	Driving Style Identification with Unsupervised Learning	MACHINE LEARNING AND DATA MINING IN PATTERN RECOGNITION (MLDM 2016)	Proceedings Paper	One way to optimise insurance prices and policies is to collect and to analyse driving trajectories: sequences of 2D-points, where time distance between any two consequitive points is a constant. Suppose that most of the drivers have safe driving style with similar statistical characteristics. Using above assumption as a main ground, we shall go through the list of all drivers (available in the d…	1	Failed title screen
Olson, R; Anger, WK; Elliot, DL; Wipfli, B; Gray, M	2009	A New Health Promotion Model for Lone Workers: Results of the Safety & Health Involvement For Truckers (SHIFT) Pilot Study	JOURNAL OF OCCUPATIONAL AND ENVIRONMENTAL MEDICINE	Article	Objective: This study was designed to evaluate the effectiveness of a new health promotion model for tone workers. Methods: A single group pre- or postlest design was used to evaluate intervention effectiveness for reducing body weight and increasing healthful and safe behaviors. Truck drivers (n = 29) from four companies participated in a 6-month intervention involving a weight loss and safe dri…	1	Failed title screen
Putnam, C; Anderson, DC; Hosley, W; Cheng, JH; Goldman, L	2017	Cognitive Rehabilitation Potential of a Driving Simulation Game for Brain Injury: A Pilot Study	EXTENDED ABSTRACTS PUBLICATION OF THE ANNUAL SYMPOSIUM ON COMPUTER-HUMAN INTERACTION IN PLAY (CHI PLAY'17 EXTENDED ABSTRACTS)	Proceedings Paper	The aim of this exploratory work was to examine how a driving simulation game might provide Speech Language Pathologists (SLPs) with an additional evidence-based commercial game option when working with their patients who have had a brain injury (BI). Research has indicated that cognitive skills required for safe driving are aligned with top SLP goals. Seven participants who had a BI played Xbox …	1	Failed title screen
Stinchcombe, A; Kadulina, Y; Lemieux, C; Aljied, R; Gagnon, S	2017	Driving is not a game: Video game experience is associated with risk-taking behaviours in the driving simulator	COMPUTERS IN HUMAN BEHAVIOR	Article	The purpose of the present investigation was to assess the impact of self-reported video games experience on performance in the driving simulator. Two simulator experiments were executed using convenience samples of young drivers who completed a simulated drive and a questionnaire that quantified their experience playing video games. In the first experiment, participants completed a comprehensive…	1	Failed title screen
Valencia-Payan, C; Munoz-Ordonez, J; Pencue-Fierro, L	2020	Driver-Assistant System Using Computer Vision and Machine Learning	REVISTA FACULTAD DE INGENIERIA, UNIVERSIDAD PEDAGOGICA Y TECNOLOGICA DE COLOMBIA	Article	Safety has been one of the key points in vehicle design, in this case one of its main objectives is to implement warning systems to notify the driver about inappropriate or atypical process in their driving process, trying to avoid accidents that affect their vehicle passengers, as well as inflicting damage on third parties. Day by day, more systems are created to monitor the environment around t…	1	Failed title screen
White Rabbit Productions. 2006. (DVD), Database: AgeLine	2006	Aging game.	White Rabbit Productions	Book	This quarterly television series, which was sponsored by AARP Utah, aired on Utah's statewide public television station, KUED-TV, in 2005-2006. Four 30-minute episodes are included on 1 videodisc: Mind and Body offers advice on maintaining a healthy mind and body; Who Do You Trust presents information on consumer fraud; Working Past Retirement reviews issues facing older workers; and On The Road …	1	Failed title screen
Xu, C; Kang, Y; Tsujino, K; Lu, CW	2013	A head posture estimation method based on 3-D images measurement for intuitive human-system interaction	2013 INTERNATIONAL JOINT CONFERENCE ON AWARENESS SCIENCE AND TECHNOLOGY & UBI-MEDIA COMPUTING (ICAST-UMEDIA)	Proceedings Paper	Real-time detection of the person's head posture is very important in field such as safe driving of automobile, man-machine interface of game and robot, and so on. Some techniques about the posture estimation of driver's head are existed, like detecting the sight line from the position of the pupil and iris of the eyes, using the positional relationship between the eyes and nose, and so on. Howev…	1	Failed title screen
Zamfolini Hallal, Camilla; Tavella Navega, Marcelo; Menezes Garcia Silva, José Adolfo; Hebling Spinoso, Deborah; Morcelli, Mary Hellen; Fernandes Crozara, Luciano; Ribeiro Marques, Nise Fisioterapia em Movimento, Jan-Mar2017; 30(1): 125-132. 8p. (Article - research, tables/charts) ISSN: 0103-5150, Database: CINAHL Plus with Full Text	2017	Do cognitive tasks during gait increase the risk of accidents with pedestrians? A study based on electromyographic parameters.	Fisioterapia em Movimento	Academic Journal	Introduction: Accidents involving pedestrians are responsible for many cases of serious injuries and deaths. Crossing streets safely requires complex planning and cognitive demand because it is necessary to perform more than one task at a time. Objective: The aim of this study was to identify electromyographic changes during gait in young subjects who performed the cognitive tasks concurrently. M…	1	Failed title screen
Ayaz, F; Sheng, ZG; Tian, DX; Guan, YL; Leung, V	2020	A Voting Blockchain based Message Dissemination in Vehicular Ad-Hoc Networks (VANETs)	ICC 2020 - 2020 IEEE INTERNATIONAL CONFERENCE ON COMMUNICATIONS (ICC)	Proceedings Paper	Secure message dissemination is an important requirement of intelligent transportation systems (ITS). Existing solutions, such as broadcasting, are effective in flooding a message to a wider area, however, they are inherently unreliable and bandwidth inefficient. Furthermore, it is difficult to both assess the authenticity of a message and maintain the privacy of sender in a single solution. More…	2	Failed abstract screen
Azmee, AA; Alvee, BI; Tisha, SN; Choudhury, PP; Antara, RSI; Kafi, AH	2020	Bus Management & Road Accident Prevention System for Smart Cities	2020 23RD INTERNATIONAL CONFERENCE ON COMPUTER AND INFORMATION TECHNOLOGY (ICCIT 2020)	Proceedings Paper	Reckless driving is a major traffic violation, caused by exceeding the speed limit, changing lanes irregularly, the drowsiness of drivers, or influence of drugs or alcohol on them. This dangerous driving practice often results in road accidents and injury or death of many innocent people. Therefore, we have come up with a new idea for this sector. Our system intends to implement a disciplined onl…	2	Failed abstract screen
Bylykbashi, K; Qafzezi, E; Ikeda, M; Matsuo, K; Barolli, L	2020	Fuzzy-based Driver Monitoring System (FDMS): Implementation of two intelligent FDMSs and a testbed for safe driving in VANETs	FUTURE GENERATION COMPUTER SYSTEMS-THE INTERNATIONAL JOURNAL OF ESCIENCE	Article	Vehicular Ad hoc Networks (VANETs) have gained a great attention due to the rapid development of mobile Internet and Internet of Things (IoT) applications. On the other hand, the competition in the automotive industry has turned into an unprecedented race to who will be the first to provide the fully autonomous cars. However, the fully autonomous driving is still a bit far from deployment, and fo…	2	Failed abstract screen
Chen, Chin-Ling; Shin, Jungpil; Tsai, Yu-Ting; Castiglione, Aniello; Palmieri, Francesco. International Journal of Foundations of Computer Science. Sep2017, Vol. 28 Issue 6, p781-797. 17p. DOI: 10.1142/S0129054117400184. , Database: Academic Search Complete	2017	Securing Information Exchange in VANETs by Using Pairing-Based Cryptography.	International Journal of Foundations of Computer Science	Academic Journal	Vehicular Ad Hoc Networks are mainly implemented to enable the interchange of huge amount of information among vehicles and between vehicles and control entities such as road side units or base stations, providing support for a comfortable and safe driving experience. However, due to the recent proliferation of cybersecurity threats, securing such a critical exchange of information becomes a fund…	2	Failed abstract screen
Cheng, S; Li, L; Chen, X; Fang, SN; Wang, XY; Wu, XH; Li, WB	2020	Longitudinal autonomous driving based on game theory for intelligent hybrid electric vehicles with connectivity	APPLIED ENERGY	Article	Autonomous driving hybrid electric vehicles can offer unprecedented opportunities for autonomous safe & energy-efficient driving. However, how to integrate energy optimization during the car-following process and vehicle safety under complex traffic flow is a formidable challenge. Moreover, the coordinated control of three chassis parts including electric motor, internal combustion engine and veh…	2	Failed abstract screen
Heyes, D; Daun, TJ; Zimmermann, A; Lienkamp, M	2015	The Virtual Driving Coach - design and preliminary testing of a predictive eco-driving assistance system for heavy-duty vehicles	EUROPEAN TRANSPORT RESEARCH REVIEW	Article	Purpose The commercial vehicle sector is characterized by high competitive pressure. Fuel consumption is one major factor that influences the transport efficiency and competitiveness of logistics companies. Therefore, an eco-driving assistance system (EDAS) is developed in order to support the driver in sustainably maintaining an efficient driving style- the Virtual Driving Coach (ViDCo). In this…	2	Failed abstract screen
Hinnant, JB; Stavrinos, D	2020	Rewards decrease risky decisions for adolescent drivers: Implications for crash prevention	TRANSPORTATION RESEARCH PART F-TRAFFIC PSYCHOLOGY AND BEHAVIOUR	Article	Motor vehicle crashes (MVCs) are a major contributor to adolescent mortality. Adolescent drivers are more likely to make risky decisions in the presence of peers. However, rewards have also been shown to improve decision making in adolescence. Our goal was to determine if peer observation and reward effects on decision-making were dependent upon adolescent driving styles. Twenty-four healthy adol…	2	Failed abstract screen
HUTCHINS, AARON. Maclean's. 6/23/2014, Vol. 127 Issue 24, p38-38. 1p. 2 Color Photographs. , Database: Academic Search Complete	2014	Watch where you're going.	Maclean's	Periodical	The article discusses usage-based insurance (UBI) programs for automobiles, focusing on the potential privacy concerns associated with the tracking technology in Canada. Topics include UBI's aims of providing discounts to safe drivers and promoting aware driving habits, the use of the technology to track teenage or elderly drivers, and concerns over the services' system of judging safe driving.	2	Failed abstract screen
Kountouriotis, GK; Wilkie, RM; Gardner, PH; Merat, N	2015	Looking and thinking when driving: The impact of gaze and cognitive load on steering	TRANSPORTATION RESEARCH PART F-TRAFFIC PSYCHOLOGY AND BEHAVIOUR	Article	Driving around bends at high speeds is a task performed by many on a daily basis but the underlying mechanisms of steering control remain largely unknown. Previous research has shown that when steering, gaze direction can be a critical component of success. However, with increased use of in-vehicle information systems (IVIS), there is growing competition over the same resources that are needed to…	2	Failed abstract screen
Ludwig, TD	2000	Intervening to improve the safety of delivery drivers: A systematic behavioral approach	JOURNAL OF ORGANIZATIONAL BEHAVIOR MANAGEMENT	Review	This monograph reviews seven field studies that evaluated behavior-based interventions designed to increase safe-driving practices of pizza deliverers. Intervention strategies focused primarily on variations of goal-setting and feedback techniques, including: (a) nonnumerical goals in an awareness and promise card intervention; (b) nonnumerical goals mandated as company policy; (c) participative …	2	Failed abstract screen
Ludwig, TD; Biggs, J; Wagner, S; Geller, ES	2001	Using public feedback and competitive rewards to increase the safe driving of pizza deliverers	JOURNAL OF ORGANIZATIONAL BEHAVIOR MANAGEMENT	Article	This study investigated the effects of a safe driving competition facilitated by publicly-posted individual feedback. The turn-signal use, safety-belt use, and complete intersection stopping of 82 pizza deliverers were observed at two experimental and three control stores, as well as among the civilian population. After baseline observations, pizza deliverers received posted weekly individual fee…	2	Failed abstract screen
Makan, H; Heyns, GJ	2018	Sustainable supply chain initiatives in reducing greenhouse gas emission within the road freight industry	JOURNAL OF TRANSPORT AND SUPPLY CHAIN MANAGEMENT	Article	Background: Global supply chains have evolved from a traditional simple supply chain to one that is filled with complexities and uncertainties. The increase in road freight transportation has resulted in an escalation in the emission of greenhouse gases (GHG) into the atmosphere, impacting climate change. Objectives: The purpose of this article was to investigate the implementation of sustainable…	2	Failed abstract screen
Malkawi, MI; AlBashiti, AI; Khasawneh, MA; Al-Migdadi, S; Alsharman, H	2015	Architectural Framework for Decision Support for Connectivity and Mobility on Roads and Vehicles Using Fuzzy Logic and Neural Networks	INNOVATION MANAGEMENT AND SUSTAINABLE ECONOMIC COMPETITIVE ADVANTAGE: FROM REGIONAL DEVELOPMENT TO GLOBAL GROWTH, VOLS I - VI, 2015	Proceedings Paper	This paper presents an architectural framework presenting a model for a safe driving environment, more efficient transport operations, lower environmental impacts and increased road safety for the driver, the vehicle in motion, and other objects near the vehicle such as pedestrians, vehicles, and property. The model utilizes a highly sophisticated neuro-fuzzy system to detect human status, which …	2	Failed abstract screen
Massoud, R; Bellotti, F; Poslad, S; Berta, R; De Gloria, A	2019	Towards a Reality-Enhanced Serious Game to Promote Eco-Driving in the Wild	GAMES AND LEARNING ALLIANCE, GALA 2019	Proceedings Paper	Reality-enhanced serious games (RESGs) incorporate data from the real world to enact training in the wild. This - with the proper cautions due to safety - can be done also for daily activities, such as driving. We have developed two modules that may be integrated as field user performance evaluators in third-party RESGs, aimed at improving driver's fuel efficiency. They exploit vehicular signals …	2	Failed abstract screen
Massoud, R; Berta, R; Poslad, S; De Gloria, A; Bellotti, F	2021	IoT Sensing for Reality-Enhanced Serious Games, a Fuel-Efficient Drive Use Case	SENSORS	Article	Internet of Things technologies are spurring new types of instructional games, namely reality-enhanced serious games (RESGs), that support training directly in the field. This paper investigates a key feature of RESGs, i.e., user performance evaluation using real data, and studies an application of RESGs for promoting fuel-efficient driving, using fuel consumption as an indicator of driver perfor…	2	Failed abstract screen
Massoud, R; Poslad, S; Bellotti, F; Berta, R; Mehran, K; De Gloria, A	2018	A Fuzzy Logic Module to Estimate a Driver's Fuel Consumption for Reality-Enhanced Serious Games	INTERNATIONAL JOURNAL OF SERIOUS GAMES	Article	Reality-enhanced gaming is an emerging serious game genre, that could contextualize a game within its real instruction-target environment. A key module for such games is the evaluator, that senses a user performance and provides consequent input to the game. In this project, we have explored an application in the automotive field, estimating driver performance in terms of fuel consumption, based …	2	Failed abstract screen
Min, K; Kim, H; Huh, K	2018	Deep Q Learning Based High Level Driving Policy Determination	2018 IEEE INTELLIGENT VEHICLES SYMPOSIUM (IV)	Proceedings Paper	With the commercialization of various Driver Assistance Systems (DAS), those vehicles have some autonomous functions like Smart Cruise Control (SCC) and Lane Keeping System (LKS). It is believed that autonomous driving can be achieved by combining the DAS functions in the limited situations such as on highways. However, in order to coordinate the DAS functions for autonomous driving, a supervisor…	2	Failed abstract screen
Miotti, Marco; Needell, Zachary A.; Ramakrishnan, Sankaran; Heywood, John; Trancik, Jessika E. Transportation Research: Part D. Sep2021, Vol. 98, pN.PAG-N.PAG. 1p. DOI: 10.1016/j.trd.2021.102918. , Database: Academic Search Complete	2021	Quantifying the impact of driving style changes on light-duty vehicle fuel consumption.	Transportation Research: Part D	Academic Journal	We examine a set of four driving style heuristics implementable by human drivers. • These improvements are applied to a large set of representative drive cycles. • They can save the average US driver 6% fuel with a 1.5% increase in travel time. • Percentage fuel savings are consistent across locations and vehicle types. Modifying driving styles can help to reduce the energy use and emissions of d…	2	Failed abstract screen
Miwata, M; Tsuneyoshi, M; Tada, Y; Ikeda, M; Barolli, L	2021	Design of an Intelligent Driving Support System for Detecting Distracted Driving	COMPLEX, INTELLIGENT AND SOFTWARE INTENSIVE SYSTEMS, CISIS-2021	Proceedings Paper	In this paper, we propose an Artificial Intelligence (AI)-based driving support system for detecting distracted driving and increasing the safe driving. We classify the hands of driver and smartphones for detecting the distracted status. We evaluate the proposed system by experiments. The experimental results show that YOLOv5-based distracted driving detection method has a good performance.	2	Failed abstract screen
Naveh, E; Marcus, A	2007	Financial performance, ISO 9000 standard and safe driving practices effects on accident rate in the US motor carrier industry	ACCIDENT ANALYSIS AND PREVENTION	Article	The question this research address is if voluntary certification with ISO 9000 standards can reduce the number of accidents large trucks have. Certification might have a positive effect depending upon the actions a company takes as a result of being certified, for instance, a company may change driver training and maintenance and how it carries out corrective action. We identified 40 ISO 9002: 19…	2	Failed abstract screen
Omar, SMHS; Fakharuzi, MHAM; Arshad, NM; Ward, TA	2013	Development of an Energy Efficient Driving Strategy for a Fuel Cell Vehicle over a Fixed Distance and Average Velocity	2013 IEEE CONFERENCE ON SYSTEMS, PROCESS & CONTROL (ICSPC)	Proceedings Paper	This paper examines the energy efficiency of a hydrogen fuel cell vehicle operating at different power settings. The goal is to develop a driving strategy to maximize energy efficiency for a fixed distance and average velocity. The test vehicle is equipped with a proton exchange membrane (PEM) fuel cell system that provides electric power to a brushless DC motor. This vehicle was designed to comp…	2	Failed abstract screen
Pietra, A; Rull, MV; Etzi, R; Gallace, A; Scurati, GW; Ferrise, F; Bordegoni, M	2021	Promoting eco-driving behavior through multisensory stimulation: a preliminary study on the use of visual and haptic feedback in a virtual reality driving simulator	VIRTUAL REALITY	Article	This paper describes the design and preliminary test of a virtual reality driving simulator capable of conveying haptic and visual messages to promote eco-sustainable driving behavior. The driving simulator was implemented through the Unity game engine; a large street environment, including high-speed and urban sections, was created to examine different driving behaviors. The hardware setup inclu…	2	Failed abstract screen
Pilkington-Cheney, F; Afghari, AP; Filtness, A; Papadimitriou, E; Lourenco, A; Brijs, T	2021	The i-DREAMS intervention strategies to reduce driver fatigue and sleepiness for different transport modes	2021 7TH INTERNATIONAL CONFERENCE ON MODELS AND TECHNOLOGIES FOR INTELLIGENT TRANSPORTATION SYSTEMS (MT-ITS)	Proceedings Paper	Driver sleepiness and fatigue are important contributors to many transport incidents and significantly increase crash risk. Recently, detection systems have been developed which aim to monitor the state of the driver and detect increasing levels of fatigue. However, there has been less focus on appropriate intervention strategies for drivers once fatigue and sleepiness have been detected. This pa…	2	Failed abstract screen
Sanguinetti, Angela; Queen, Ella; Yee, Christopher; Akanesuvan, Kantapon. Transportation Research: Part F. Apr2020, Vol. 70, p1-14. 14p. DOI: 10.1016/j.trf.2020.02.010. , Database: Academic Search Complete	2020	Average impact and important features of onboard eco-driving feedback: A meta-analysis.	Transportation Research: Part F	Academic Journal	Onboard eco-driving feedback improves fuel economy by 6.6% on average. • The impact of most onboard feedback tested to-date deteriorates over time. • Eco-driving feedback should include both fine- and course-grained information. • Eco-driving feedback should include performance standards. • Multimodal eco-driving feedback may be more effective than visual only. • Gamification may enhance eco-driv…	2	Failed abstract screen
Sezgin, E; Lin, S	2019	Technology-Based Interventions, Assessments, and Solutions for Safe Driving Training for Adolescents: Rapid Review	JMIR MHEALTH AND UHEALTH	Review	Background: Safe driving training for adolescents aims to prevent injury and promote their well-being. In that regard, information and communication technologies have been used to understand adolescent driving behavior and develop interventions. Objective: The purpose of this review is to explore and discuss existing approaches to technology-based driving interventions, driving assessments, and s…	2	Failed abstract screen
Sureeyatanapas, P; Poophiukhok, P; Pathumnakul, S	2018	Green initiatives for logistics service providers: An investigation of antecedent factors and the contributions to corporate goals	JOURNAL OF CLEANER PRODUCTION	Article	Concern for sustainability has become more intense among business practitioners due to increasing societal demand for environmental care. Product sellers nowadays cannot sustain themselves in the competitive market only from greening the manufacturing processes, but all parties across the supply chain are also driven to be 'green', even logistics service providers (LSPs). This study aims to provi…	2	Failed abstract screen
Zdravkovic, S; Vujanovic, D; Stokic, M; Pamucar, D	2021	Evaluation of professional driver's eco-driving skills based on type-2 fuzzy logic model	NEURAL COMPUTING & APPLICATIONS	Article	Due to the great market competition, transport companies face the need to reduce their vehicle fleet costs. The vehicle fleet managers' actions on the driver's driving style to achieve fuel consumption savings are measures to increase the fleet's energy efficiency. The authors developed a model for evaluating driving style using a type-2 fuzzy logic system. The model comprehensively considers thr…	2	Failed abstract screen
Zhao, C; Li, L; Pei, X; Li, ZH; Wang, FY; Wu, XB	2021	A comparative study of state-of-the-art driving strategies for autonomous vehicles	ACCIDENT ANALYSIS AND PREVENTION	Article	The autonomous vehicle is regarded as a promising technology with the potential to reshape mobility and solve many traffic issues, such as accessibility, efficiency, convenience, and especially safety. Many previous studies on driving strategies mainly focused on the low-level detailed driving behaviors or specific traffic scenarios but lacked the high-level driving strategy studies. Though resea…	2	Failed abstract screen
Plechawska-Wojcik, M; Drozdzyk, T; Kaczorowska, M; Tokovarov, M	2020	GAMIFICATION AS A TOOL PROMOTING A PRO-ECOLOGICAL ATTITUDE AMONG DRIVERS	14TH INTERNATIONAL TECHNOLOGY, EDUCATION AND DEVELOPMENT CONFERENCE (INTED2020)	Proceedings Paper	Gamification finds progressively more interest in the field of education. The authors present the application of gamificional concept in promoting eco-friendly way of driving thus helping to educate people regarding pro-ecological behaviour. Nowadays students often use cars so the topic of pro-ecological driving style is very important for environment. The main objective of the project was to dev…	3	Failed - unobtainable full text
Borawski, M; Borawska, A	2021	The use of a computer game in a social campaign to improve road safety	KNOWLEDGE-BASED AND INTELLIGENT INFORMATION & ENGINEERING SYSTEMS (KSE 2021)	Proceedings Paper	Road traffic deaths and injuries remain a major global concern and current trends suggest that it would not change in the near future. To reverse this tendency, numerous actions are being taken to improve road safety. The implementation and enforcement of legislation on key risk factors are main elements of an integrated strategy to prevent road fatalities in most countries. Legislation should, h…	4.1	Failed full text - not eco driving
Hitomi, K; Matsui, K; Rivas, A; Corchado, JM	2020	Development of a Dangerous Driving Suppression System Using Inverse Reinforcement Learning and Blockchain	DISTRIBUTED COMPUTING AND ARTIFICIAL INTELLIGENCE, 16TH INTERNATIONAL CONFERENCE	Proceedings Paper	Casualty injury rate in car accident is still high level. The number of annual traffic accident casualties in the world today is as much as 1.35 million, and those accidents are caused by reckless driving such as signal ignoring and over speed. In this research, we propose a system which can encourage drivers to make safe driving voluntary using a driving manner evaluation mechanism. Our proposed…	4.1	Failed full text - not eco driving
Hsu, CC; Chen, YL; Chou, WC; Huang, SH; Chang, KK	2018	Motorcycle Riding Safety Education With Virtual Reality	2018 IEEE INTERNATIONAL CONFERENCE ON ARTIFICIAL INTELLIGENCE AND VIRTUAL REALITY (AIVR)	Proceedings Paper	Young novice drivers are the group of drivers most likely to crash. Young novice drivers who tend to misidentify potential hazards in the traffic environment. There are a number of factors that contribute to the high crash risk experienced by these drivers. Age and lack of driving experience are the main factors behind young drivers having an increased risk of being involved in a road traffic col…	4.1	Failed full text - not eco driving
Li, Q; Tay, R	2014	Improving drivers' knowledge of road rules using digital games	ACCIDENT ANALYSIS AND PREVENTION	Article	Although a proficient knowledge of the road rules is important to safe driving, many drivers do not retain the knowledge acquired after they have obtained their licenses. Hence, more innovative and appealing methods are needed to improve drivers' knowledge of the road rules. This study examines the effect of game based learning on drivers' knowledge acquisition and retention. We find that playing…	4.1	Failed full text - not eco driving
Rhodes L; Duignan F; Harris W; Rhodes, Linden; Duignan, Fiona; Harris, Wendy Health Promotion Journal of Australia, 2006 Apr; 17(1): 27-31. 5p. (journal article - research, tables/charts) ISSN: 1036-1073 PMID: NLM16619932, Database: CINAHL Plus with Full Text	2006	Playing the game on the World Wide Web.	Health Promotion Journal of Australia	Academic Journal	Issue Addressed: 'Celebrate - do it Safely' is a project aimed at reducing youth alcohol-related harm on the Central Coast, New South Wales (NSW). The primary focus for 2003 was to use the world wide web and the website www.celebratesafely.com.au to raise awareness and reinforce the message of how to party safely to young people.Methods: A creative, interactive website was set up to be a local an…	4.1	Failed full text - not eco driving
Asadi, M; Fathy, M; Mahini, H; Rahmani, AM		An Evolutionary Game Approach to Safety-Aware Speed Recommendation in Fog/Cloud-Based Intelligent Transportation Systems	IEEE TRANSACTIONS ON INTELLIGENT TRANSPORTATION SYSTEMS	Article; Early Access	Vehicle speed is known as one of the most important parameters in the various goals for driving. Although the most critical goal of driving is safety, each driver can consider another secondary goal, such as reducing travel time, economical driving, green driving, passenger comfort, etc. In this paper, we propose a smartphone-based application that utilizes the cloud/fog computing service infrast…	4.2	Failed full text - not gamification
Mauri, GL; Bressan, E; Velardo, FC; Cacciabue, PC	2018	Dynamic risk assessment during eco-driving behaviors for conventionally fueled vehicles	SAFETY AND RELIABILITY - SAFE SOCIETIES IN A CHANGING WORLD	Proceedings Paper	The urgency of applying a more ethical approaches to get to a sustainable low-carbon economy by 2050 requires to implement a model of sustainable mobility, which embraces social, economical and industrial activities. In this horizon, behavioral change can produce considerable benefits whose effects are distributed on wider period. In this direction, the GamECAR project aims at provoking a change …	4.2	Failed full text - not gamification
Nykanen, A; Lundkvist, A; Lindberg, S; Lopez, M	2016	SAFE AND SOUND DRIVE: SOUND BASED GAMIFICATION OF USER INTERFACES IN CARS	61ST AES INTERNATIONAL CONFERENCE ON AUDIO FOR GAMES	Proceedings Paper	The Safe and Sound Drive project concerns the design of an audio-only serious game for cars that will help drivers to increase eco-driving skills, lower fuel consumption and encourage safe and environmentally friendly approaches to driving. Methods and procedures for the design of sounds for audio-only user interfaces are reviewed and discussed, and design work and preliminary results from user s…	4.2	Failed full text - not gamification
Ali, Nazam; Piantanakulchai, Mongkut. Songklanakarin Journal of Science & Technology. May/Jun2020, Vol. 42 Issue 3, p496-503. 8p. , Database: Academic Search Complete	2020	Self-reported inclination of heavy-duty vehicle drivers to adopt eco-driving in different motivation contexts.	Journal of Science & Technology	Academic Journal	Eco-driving is an emerging field of research. Due to its positive dimensions on fuel-economy and environmental emissions, it is becoming a well-known concept in transportation industry. Behavioral responses of drivers’ readiness to adopt eco-driving are studied. Questionnaires are collected from 87 truck drivers working for a logistics firm in Thailand. Eco-driving was introduced using three diff…	4.3	Failed full text - no system
Franke, T; Arend, MG; McIlroy, RC; Stanton, NA	2017	What Drives Ecodriving? Hybrid Electric Vehicle Drivers' Goals and Motivations to Perform Energy Efficient Driving Behaviors	ADVANCES IN HUMAN ASPECTS OF TRANSPORTATION	Proceedings Paper	Hybrid electric vehicles (HEVs) can significantly contribute to sustainable road transport, yet driver behavior has a marked effect on actual energy efficiency (i.e., the ultimate sustainability effect). The objective of the present research was to examine ecodriving motivation of HEV drivers. To this end, we recruited 39 HEV drivers with above-average fuel efficiencies (suggesting at least some …	4.3	Failed full text - no system
Lalos, AS; Nousias, S; Moustakas, K	2018	GamECAR: Gamifying Self-Management of Eco-driving	ERCIM NEWS	Article	GamECAR is a Euroean project that aims to teach drivers to adopt an eco-friendly driving style through a serious games platform.	4.4	Failed full text - duplicated content
Prendinger, H; Puntumapon, K; Madruga, M	2016	Extending Real-Time Challenge Balancing to Multiplayer Games: A Study on Eco-Driving	IEEE TRANSACTIONS ON COMPUTATIONAL INTELLIGENCE AND AI IN GAMES	Article	Multiplayer games are an important and popular game mode for networked players. Since games are played by a diverse audience, it is important to scale the difficulty, or challenge, according to the skill level of the players. However, current approaches to real-time challenge balancing (RCB) in games are only applicable to single-player scenarios. In multiplayer scenarios, players with different …	4.5	Failed full text - focus on software design
